# Supplementary material for: Combined Effect of Climate and Anthropopressure on River Water Quality
Source: MDPI journal article supplement (doi:10.3390/ijerph20043032), 2023-02-09
Supplement: s1 [file s1]

**Table S1.** Sampling site characteristics.

| Sampling Site | Characteristics                                                                                                                         |
|---------------|-----------------------------------------------------------------------------------------------------------------------------------------|
| 1             | Source area of the river; protection area (the Łódzkie Hills Landscape Park)                                                            |
| 2             | Residential area; near the national road 71                                                                                             |
| 3             | Urban area (the city of Zgierz)                                                                                                         |
| 4             | Below the wastewater treatment plant (for the city of Zgierz), waste landfill, and industrial park; suburban area of the city of Zgierz |
| 5             | Agricultural land                                                                                                                       |
| 6             | Below the wastewater treatment plant (for the city of Aleksandrów Łódzki); meadows and agricultural land                                |
| 7             | Near the motorway A2; meadows and agricultural land                                                                                     |
| 8             | Near the local, busy road; meadows, and agricultural land                                                                               |
| 9             | Urban area (the city of Ozorków)                                                                                                        |
| 10            | Below the wastewater treatment plant (for the city of Ozorków); agricultural land                                                       |
| 11            | Near the provincial road; meadows, and wasteland, below the city of Łęczyca                                                             |
| 12            | Agricultural land (cultivation of vegetables and cereals); floodplains                                                                  |
| 13            | Agricultural land (cultivation of vegetables and cereals); floodplains                                                                  |
| 14            | Agricultural land (cultivation of cereals)                                                                                              |
| 15            | Near the national road 92; warehouse and service areas                                                                                  |
| 16            | Urban area (the city of Łowicz)                                                                                                         |
| 17            | Agricultural land (orchard crops)                                                                                                       |

**Table S2.** Percentage of results that exceeded the threshold values for class II [31].

|                  | 2018 | 2019 | 2018 and 2019 |
|------------------|------|------|---------------|
| EC               | 22   | 35   | 28            |
| DO               | 21   | 21   | 21            |
| DOC              | 92   | 84   | 88            |
| NO <sub>3</sub>  | 50   | 22   | 37            |
| PO <sub>4</sub>  | 97   | 94   | 96            |
| HCO <sub>3</sub> | 35   | 35   | 35            |
| Cl               | 87   | 100  | 94            |
| Ca               | 79   | 33   | 56            |
| Mg               | 21   | 11   | 16            |

**Table S3.** Results of the determined parameters in the Bzura River water for the individual sampling sites in 2018.

| Parameter                  |        | 1           | 2           | 3           | 4           | 5           | 6           | 7           | 8           | 9           | 10          | 11          | 12          | 13          |
|----------------------------|--------|-------------|-------------|-------------|-------------|-------------|-------------|-------------|-------------|-------------|-------------|-------------|-------------|-------------|
| EC<br>[μS/cm]              | min    | 266         | 297         | 398         | 790         | 616         | 640         | 582         | 544         | 530         | 465         | 423         | 566         | 689         |
|                            | max    | 509         | 557         | 762         | 1297        | 962         | 1110        | 870         | 876         | 874         | 828         | 912         | 1088        | 1140        |
|                            | mean   | <b>408</b>  | <b>445</b>  | <b>554</b>  | <b>1115</b> | <b>826</b>  | <b>843</b>  | <b>774</b>  | <b>739</b>  | <b>707</b>  | <b>689</b>  | <b>728</b>  | <b>839</b>  | <b>917</b>  |
|                            | CV [%] | 17.3        | 17.3        | 20.3        | 14.7        | 12.6        | 14.5        | 11.0        | 12.7        | 13.4        | 16.0        | 20.9        | 21.5        | 16.7        |
| temp<br>[°C]               | min    | 1.6         | 0.4         | 1.8         | 5.8         | 3.1         | 3.5         | 2.9         | 2.9         | 1.7         | 1.7         | 1.4         | 0.8         | 0.4         |
|                            | max    | 19.8        | 19.3        | 21.0        | 20.6        | 19.3        | 19.2        | 18.6        | 18.6        | 19.3        | 19.5        | 21.4        | 22.2        | 22.9        |
|                            | mean   | <b>11.9</b> | <b>10.7</b> | <b>12.2</b> | <b>13.8</b> | <b>11.5</b> | <b>11.9</b> | <b>11.4</b> | <b>11.6</b> | <b>11.7</b> | <b>11.6</b> | <b>11.9</b> | <b>12.3</b> | <b>12.6</b> |
|                            | CV [%] | 62.2        | 69.6        | 67.9        | 45.9        | 56.4        | 52.8        | 53.0        | 51.9        | 55.5        | 56.6        | 60.1        | 65.5        | 65.2        |
| DO<br>[mg/L]               | min    | 6.6         | 5.7         | 2.1         | 1.1         | 4.7         | 6.4         | 7.1         | 7.0         | 6.4         | 5.1         | 5.1         | 1.6         | 2.4         |
|                            | max    | 13.8        | 12.6        | 13.1        | 9.3         | 11.6        | 12.4        | 12.8        | 11.7        | 12.5        | 12.1        | 12.5        | 12.1        | 13.0        |
|                            | mean   | <b>8.9</b>  | <b>8.6</b>  | <b>7.6</b>  | <b>5.1</b>  | <b>7.7</b>  | <b>8.8</b>  | <b>9.3</b>  | <b>9.3</b>  | <b>9.3</b>  | <b>8.5</b>  | <b>9.0</b>  | <b>7.3</b>  | <b>8.4</b>  |
|                            | CV [%] | 25.4        | 27.1        | 50.7        | 51.2        | 29.8        | 21.3        | 19.2        | 16.7        | 20.4        | 27.8        | 27.5        | 43.1        | 37.8        |
| DOC<br>[mg/L]              | min    | 6.7         | 10.0        | 8.7         | 17.5        | 12.8        | 14.1        | 10.9        | 12.1        | 10.5        | 10.3        | 11.5        | 7.2         | 10.5        |
|                            | max    | 14.6        | 16.8        | 19.5        | 31.0        | 19.6        | 20.8        | 20.7        | 20.1        | 33.5        | 24.1        | 37.4        | 20.7        | 43.7        |
|                            | mean   | <b>10.3</b> | <b>13.2</b> | <b>14.6</b> | <b>25.0</b> | <b>16.5</b> | <b>17.6</b> | <b>14.9</b> | <b>15.3</b> | <b>16.0</b> | <b>15.0</b> | <b>17.8</b> | <b>16.4</b> | <b>20.7</b> |
|                            | CV [%] | 26.9        | 17.1        | 22.1        | 17.1        | 14.0        | 13.5        | 18.0        | 17.2        | 40.1        | 25.2        | 40.1        | 24.7        | 41.9        |
| NO <sub>3</sub><br>[mg/L]  | min    | 0.9         | n.d.        | n.d.        | 1.3         | 0.2         | 3.9         | 5.7         | 3.7         | 1.7         | 3.2         | 4.2         | 7.3         | 7.5         |
|                            | max    | 37.3        | 23.2        | 13.8        | 26.5        | 17.5        | 32.5        | 24.2        | 16.4        | 63.6        | 35.7        | 61.4        | 95.1        | 112         |
|                            | mean   | <b>9.5</b>  | <b>6.9</b>  | <b>5.4</b>  | <b>13.3</b> | <b>9.2</b>  | <b>14.2</b> | <b>11.9</b> | <b>10.8</b> | <b>17.2</b> | <b>15.5</b> | <b>26.9</b> | <b>45.4</b> | <b>45.0</b> |
|                            | CV [%] | 136         | 133         | 78.4        | 63.9        | 61.0        | 69.3        | 49.5        | 39.8        | 113         | 73.1        | 71.6        | 73.4        | 77.9        |
| PO <sub>4</sub><br>[mg/L]  | min    | 0.2         | 0.5         | 0.02        | 1.2         | 0.6         | 1.1         | 1.1         | 1.0         | 0.8         | 1.0         | 0.7         | 0.8         | 1.0         |
|                            | max    | 3.0         | 1.4         | 1.9         | 2.9         | 2.4         | 4.1         | 3.4         | 2.8         | 2.4         | 2.3         | 2.6         | 4.0         | 1.7         |
|                            | mean   | <b>0.7</b>  | <b>1.9</b>  | <b>1.0</b>  | <b>1.8</b>  | <b>1.2</b>  | <b>2.4</b>  | <b>2.1</b>  | <b>1.8</b>  | <b>1.7</b>  | <b>1.6</b>  | <b>1.5</b>  | <b>1.5</b>  | <b>1.3</b>  |
|                            | CV [%] | 111         | 31.8        | 56.3        | 34.6        | 39.4        | 39.4        | 36.0        | 33.5        | 31.5        | 25.3        | 35.3        | 54.3        | 17.5        |
| HCO <sub>3</sub><br>[mg/L] | min    | 106         | 162         | 145         | 211         | 184         | 185         | 197         | 199         | 190         | 140         | 105         | 200         | 239         |
|                            | max    | 253         | 267         | 430         | 312         | 284         | 290         | 251         | 243         | 263         | 245         | 271         | 317         | 334         |
|                            | mean   | <b>150</b>  | <b>199</b>  | <b>236</b>  | <b>287</b>  | <b>250</b>  | <b>254</b>  | <b>233</b>  | <b>224</b>  | <b>224</b>  | <b>221</b>  | <b>233</b>  | <b>269</b>  | <b>297</b>  |
|                            | CV [%] | 28.4        | 15.6        | 30.8        | 9.2         | 9.5         | 12.7        | 7.3         | 6.1         | 8.2         | 13.2        | 18.0        | 13.5        | 10.5        |
| Cl<br>[mg/L]               | min    | 30.1        | 29.3        | 37.9        | 105         | 78.0        | 70.9        | 64.7        | 71.7        | 67.4        | 57.5        | 48.2        | 67.4        | 68.2        |
|                            | max    | 37.2        | 35.5        | 70.0        | 258         | 201         | 184         | 131         | 127         | 134         | 116         | 104         | 118         | 149         |
|                            | mean   | <b>32.8</b> | <b>32.5</b> | <b>46.8</b> | <b>181</b>  | <b>111</b>  | <b>116</b>  | <b>99.4</b> | <b>94.4</b> | <b>88.3</b> | <b>80.8</b> | <b>75.0</b> | <b>86.1</b> | <b>98.7</b> |
|                            | CV [%] | 6.5         | 5.6         | 17.9        | 53.5        | 33.2        | 34.4        | 20.7        | 20.1        | 25.0        | 24.1        | 23.0        | 20.2        | 27.1        |
| Na<br>[mg/L]               | min    | 13.7        | 14.0        | 22.1        | 84.4        | 57.1        | 53.5        | 48.6        | 52.6        | 48.1        | 43.7        | 8.9         | 33.9        | 26.2        |
|                            | max    | 17.7        | 18.7        | 44.7        | 195         | 152         | 151         | 106         | 103         | 98.2        | 90.2        | 88.8        | 98.0        | 121         |
|                            | mean   | <b>15.6</b> | <b>15.9</b> | <b>27.0</b> | <b>145</b>  | <b>81.4</b> | <b>91.1</b> | <b>78.2</b> | <b>72.9</b> | <b>65.6</b> | <b>61.1</b> | <b>50.3</b> | <b>60.1</b> | <b>66.5</b> |
|                            | CV [%] | 8.1         | 9.7         | 22.6        | 21.8        | 34.8        | 39.5        | 23.4        | 23.4        | 26.3        | 26.9        | 44.0        | 37.4        | 49.8        |
| K<br>[mg/L]                | min    | 1.4         | 2.1         | 3.6         | 14.2        | 7.4         | 8.2         | 8.5         | 7.9         | 7.1         | 6.7         | 6.5         | 6.5         | 6.2         |
|                            | max    | 2.1         | 3.8         | 4.9         | 21.9        | 17.2        | 19.2        | 15.0        | 13.4        | 11.9        | 12.0        | 57.0        | 12.8        | 17.8        |
|                            | mean   | <b>1.8</b>  | <b>2.9</b>  | <b>4.4</b>  | <b>17.2</b> | <b>10.1</b> | <b>12.1</b> | <b>10.5</b> | <b>9.7</b>  | <b>8.7</b>  | <b>8.8</b>  | <b>12.5</b> | <b>9.0</b>  | <b>10.8</b> |
|                            | CV [%] | 11.4        | 20.0        | 9.1         | 17.8        | 29.3        | 34.2        | 20.4        | 20.0        | 19.9        | 20.7        | 112.7       | 22.8        | 35.1        |
| Ca<br>[mg/L]               | min    | 27.0        | 36.9        | 31.7        | 38.0        | 32.3        | 37.3        | 44.4        | 43.6        | 35.6        | 26.7        | 15.2        | 28.0        | 55.7        |
|                            | max    | 120         | 139         | 137         | 157         | 184         | 178         | 174         | 160         | 169         | 156         | 157         | 196         | 226         |
|                            | mean   | <b>74.0</b> | <b>80.6</b> | <b>94.9</b> | <b>104</b>  | <b>107</b>  | <b>99.7</b> | <b>101</b>  | <b>98.6</b> | <b>102</b>  | <b>94.4</b> | <b>110</b>  | <b>127</b>  | <b>144</b>  |
|                            | CV [%] | 35.1        | 34.4        | 29.5        | 27.9        | 32.6        | 35.2        | 30.4        | 29.0        | 33.8        | 34.2        | 34.0        | 35.8        | 32.2        |
| Mg<br>[mg/L]               | min    | 2.3         | 3.0         | 4.4         | 4.7         | 5.1         | 5.1         | 4.6         | 4.4         | 4.2         | 4.5         | 4.9         | 6.6         | 7.1         |
|                            | max    | 9.0         | 12.5        | 17.6        | 18.5        | 17.4        | 15.9        | 14.7        | 16.0        | 13.2        | 16.2        | 21.6        | 25.9        | 34.6        |
|                            | mean   | <b>5.5</b>  | <b>6.7</b>  | <b>10.0</b> | <b>11.0</b> | <b>10.8</b> | <b>10.3</b> | <b>8.7</b>  | <b>8.7</b>  | <b>8.4</b>  | <b>8.8</b>  | <b>10.5</b> | <b>13.0</b> | <b>17.4</b> |
|                            | CV [%] | 35.8        | 42.2        | 36.4        | 35.0        | 34.9        | 30.7        | 35.6        | 34.3        | 31.0        | 37.9        | 44.3        | 46.5        | 46.7        |

**Table S4.** Results of the determined parameters in the Bzura River water for the individual sampling sites in 2019.

|                            | Parameter | 1           | 2           | 3           | 4           | 5           | 6           | 7           | 8           | 9           | 10          | 11          | 12          | 13          | 14          | 15          | 16          | 17          |
|----------------------------|-----------|-------------|-------------|-------------|-------------|-------------|-------------|-------------|-------------|-------------|-------------|-------------|-------------|-------------|-------------|-------------|-------------|-------------|
| EC<br>[μS/cm]              | min       | 327         | 352         | 435         | 737         | 573         | 540         | 473         | 451         | 444         | 440         | 420         | 507         | 549         | 479         | 315         | 451         | 486         |
|                            | max       | 424         | 438         | 731         | 1405        | 1048        | 1137        | 914         | 867         | 817         | 781         | 749         | 932         | 1035        | 688         | 664         | 682         | 674         |
|                            | mean      | <b>369</b>  | <b>407</b>  | <b>509</b>  | <b>1101</b> | <b>851</b>  | <b>862</b>  | <b>716</b>  | <b>677</b>  | <b>642</b>  | <b>637</b>  | <b>645</b>  | <b>682</b>  | <b>759</b>  | <b>599</b>  | <b>544</b>  | <b>590</b>  | <b>598</b>  |
|                            | CV [%]    | 8.5         | 5.7         | 14.8        | 16.6        | 16.2        | 19.9        | 15.2        | 16.0        | 16.0        | 14.5        | 13.2        | 15.0        | 15.2        | 12.2        | 19.5        | 13.4        | 10.4        |
| temp<br>[°C]               | min       | 2.6         | 1.4         | 2.3         | 6.5         | 4.9         | 4.5         | 4.0         | 4.0         | 3.6         | 3.2         | 2.8         | 2.0         | 1.6         | 1.5         | 1.5         | 1.8         | 1.5         |
|                            | max       | 16.8        | 18.8        | 21.3        | 21.7        | 19.9        | 20.8        | 19.8        | 20.2        | 19.5        | 19.4        | 19.4        | 22.1        | 22.3        | 22.8        | 22.3        | 23.4        | 22.5        |
|                            | mean      | <b>9.7</b>  | <b>9.1</b>  | <b>11.4</b> | <b>14.2</b> | <b>11.8</b> | <b>12.1</b> | <b>10.9</b> | <b>10.9</b> | <b>10.9</b> | <b>10.7</b> | <b>10.7</b> | <b>11.0</b> | <b>10.9</b> | <b>11.0</b> | <b>10.8</b> | <b>11.3</b> | <b>11.1</b> |
|                            | CV [%]    | 47.2        | 58.4        | 59.9        | 38.0        | 43.8        | 46.7        | 46.9        | 48.7        | 49.4        | 51.0        | 54.4        | 60.9        | 62.9        | 59.8        | 60.1        | 59.1        | 59.5        |
| DO<br>[mg/L]               | min       | 7.1         | 5.7         | 3.0         | 2.8         | 3.9         | 6.2         | 6.3         | 6.4         | 6.1         | 5.6         | 5.7         | 3.2         | 3.6         | 4.8         | 5.8         | 5.8         | 6.0         |
|                            | max       | 10.1        | 9.8         | 10.5        | 8.0         | 8.9         | 10.1        | 10.8        | 10.8        | 10.8        | 10.5        | 10.9        | 10.6        | 10.2        | 11.4        | 10.4        | 10.7        | 10.3        |
|                            | mean      | <b>8.9</b>  | <b>8.2</b>  | <b>7.4</b>  | <b>5.5</b>  | <b>7.1</b>  | <b>8.3</b>  | <b>8.7</b>  | <b>8.6</b>  | <b>8.6</b>  | <b>8.2</b>  | <b>8.2</b>  | <b>7.4</b>  | <b>7.7</b>  | <b>8.5</b>  | <b>8.5</b>  | <b>8.8</b>  | <b>8.4</b>  |
|                            | CV [%]    | 11.2        | 13.9        | 34.7        | 32.4        | 22.2        | 15.5        | 16.3        | 16.2        | 16.6        | 18.0        | 19.4        | 29.7        | 25.8        | 25.8        | 16.8        | 17.9        | 16.5        |
| DOC<br>[mg/L]              | min       | 7.8         | 9.1         | 10.6        | 12.7        | 12.1        | 12.6        | 10.6        | 10.6        | 10.3        | 9.9         | 9.0         | 10.3        | 10.3        | 11.9        | 9.8         | 9.9         | 9.1         |
|                            | max       | 16.5        | 24.5        | 27.5        | 35.4        | 28.5        | 25.6        | 24.7        | 27.7        | 24.3        | 17.9        | 28.5        | 21.6        | 15.3        | 18.8        | 23.0        | 16.2        | 15.7        |
|                            | mean      | <b>10.3</b> | <b>14.2</b> | <b>16.0</b> | <b>24.4</b> | <b>18.5</b> | <b>18.1</b> | <b>16.6</b> | <b>15.6</b> | <b>13.9</b> | <b>13.2</b> | <b>15.1</b> | <b>14.0</b> | <b>13.0</b> | <b>15.5</b> | <b>14.6</b> | <b>13.5</b> | <b>12.3</b> |
|                            | CV [%]    | 24.6        | 27.5        | 29.7        | 25.3        | 23.8        | 23.2        | 24.1        | 31.2        | 29.1        | 19.7        | 35.4        | 23.4        | 12.6        | 12.9        | 23.1        | 13.8        | 15.7        |
| NO <sub>3</sub><br>[mg/L]  | min       | 1.5         | n.d.        | n.d.        | n.d.        | 1.1         | 1.7         | 3.4         | 2.4         | 1.7         | 1.0         | 2.2         | 1.9         | n.d.        | 4.4         | 1.6         | 3.4         | 4.1         |
|                            | max       | 12.7        | 57.5        | 14.2        | 26.7        | 22.7        | 62.1        | 18.5        | 18.6        | 20.7        | 14.5        | 101         | 56.1        | 66.2        | 104         | 113         | 126         | 106         |
|                            | mean      | <b>5.0</b>  | <b>6.8</b>  | <b>2.8</b>  | <b>6.7</b>  | <b>7.3</b>  | <b>17.9</b> | <b>11.6</b> | <b>9.0</b>  | <b>8.1</b>  | <b>8.8</b>  | <b>20.8</b> | <b>18.8</b> | <b>27.0</b> | <b>22.8</b> | <b>22.3</b> | <b>24.5</b> | <b>22.9</b> |
|                            | CV [%]    | 68.4        | 248         | 150         | 107         | 76.0        | 83.6        | 44.3        | 62.0        | 65.4        | 48.2        | 129         | 99.6        | 99.0        | 134         | 148         | 148         | 129         |
| PO <sub>4</sub><br>[mg/L]  | min       | 0.2         | 0.2         | 0.2         | 1.2         | 0.8         | 0.8         | 1.0         | 0.9         | 0.8         | 0.8         | 0.7         | 0.7         | 0.2         | 0.4         | 0.3         | 0.2         | 0.3         |
|                            | max       | 0.7         | 1.4         | 2.4         | 3.2         | 2.3         | 4.1         | 3.1         | 3.1         | 2.2         | 2.2         | 2.1         | 3.2         | 2.4         | 1.9         | 1.3         | 1.6         | 2.1         |
|                            | mean      | <b>0.4</b>  | <b>0.9</b>  | <b>1.0</b>  | <b>2.1</b>  | <b>1.4</b>  | <b>2.6</b>  | <b>2.0</b>  | <b>1.9</b>  | <b>1.6</b>  | <b>1.6</b>  | <b>1.5</b>  | <b>1.5</b>  | <b>1.4</b>  | <b>1.0</b>  | <b>0.9</b>  | <b>0.8</b>  | <b>0.8</b>  |
|                            | CV [%]    | 38.8        | 48.6        | 56.4        | 33.6        | 37.3        | 43.9        | 35.4        | 39.0        | 27.2        | 25.9        | 28.9        | 46.2        | 41.9        | 46.1        | 39.1        | 50.1        | 56.2        |
| HCO <sub>3</sub><br>[mg/L] | min       | 128         | 175         | 192         | 247         | 227         | 220         | 198         | 191         | 196         | 194         | 183         | 210         | 227         | 207         | 214         | 215         | 238         |
|                            | max       | 321         | 240         | 343         | 341         | 298         | 310         | 279         | 259         | 251         | 253         | 252         | 265         | 330         | 277         | 296         | 278         | 287         |
|                            | mean      | <b>187</b>  | <b>197</b>  | <b>230</b>  | <b>299</b>  | <b>264</b>  | <b>260</b>  | <b>237</b>  | <b>227</b>  | <b>225</b>  | <b>229</b>  | <b>229</b>  | <b>246</b>  | <b>281</b>  | <b>254</b>  | <b>261</b>  | <b>259</b>  | <b>273</b>  |
|                            | CV [%]    | 33.4        | 8.7         | 16.9        | 10.4        | 8.8         | 11.0        | 9.2         | 9.0         | 7.7         | 8.0         | 8.8         | 7.7         | 10.2        | 8.1         | 9.2         | 8.0         | 6.0         |
| Cl<br>[mg/L]               | min       | 34.5        | 36.5        | 50.6        | 182         | 116         | 95.8        | 86.8        | 63.2        | 74.9        | 71.7        | 81.0        | 81.0        | 90.4        | 25.1        | 53.1        | 55.6        | 54.1        |
|                            | max       | 42.7        | 55.1        | 169         | 340         | 248         | 283         | 193         | 172         | 146         | 135         | 128         | 178         | 193         | 99.2        | 92.8        | 95.4        | 93.7        |
|                            | mean      | <b>38.2</b> | <b>40.6</b> | <b>64.4</b> | <b>255</b>  | <b>173</b>  | <b>170</b>  | <b>128</b>  | <b>112</b>  | <b>105</b>  | <b>101</b>  | <b>99</b>   | <b>103</b>  | <b>120</b>  | <b>73.4</b> | <b>70.1</b> | <b>72.7</b> | <b>72.2</b> |
|                            | CV [%]    | 6.9         | 12.9        | 51.6        | 19.8        | 24.8        | 32.3        | 23.2        | 26.0        | 20.2        | 18.4        | 15.9        | 25.2        | 24.2        | 26.2        | 16.9        | 15.1        | 14.2        |
| Na<br>[mg/L]               | min       | 14.0        | 14.7        | 23.2        | 127         | 81.0        | 73.3        | 58.2        | 51.9        | 48.4        | 49.0        | 50.2        | 50.0        | 40.8        | 25.2        | 20.7        | 21.9        | 23.4        |
|                            | max       | 20.5        | 33.0        | 128         | 290         | 185         | 221         | 145         | 154         | 130         | 119         | 131         | 187         | 197         | 77.5        | 72.8        | 73.4        | 78.6        |
|                            | mean      | <b>17.4</b> | <b>17.9</b> | <b>37.2</b> | <b>205</b>  | <b>129</b>  | <b>134</b>  | <b>98.8</b> | <b>93.4</b> | <b>83.4</b> | <b>80.3</b> | <b>77.0</b> | <b>79.0</b> | <b>87.0</b> | <b>47.2</b> | <b>40.2</b> | <b>41.8</b> | <b>44.7</b> |

|                     |        |             |             |             |             |             |             |             |             |             |             |             |             |             |             |             |             |             |
|---------------------|--------|-------------|-------------|-------------|-------------|-------------|-------------|-------------|-------------|-------------|-------------|-------------|-------------|-------------|-------------|-------------|-------------|-------------|
|                     | CV [%] | 11.7        | 28.2        | 77.4        | 25.0        | 29.1        | 37.1        | 28.3        | 30.6        | 28.8        | 28.2        | 34.5        | 48.1        | 55.5        | 28.7        | 36.0        | 33.6        | 30.9        |
| <b>K</b><br>[mg/L]  | min    | 1.5         | 1.9         | 3.6         | 14.1        | 8.8         | 8.3         | 7.1         | 6.4         | 6.1         | 6.7         | 6.3         | 7.3         | 6.1         | 5.0         | 4.1         | 4.4         | 5.2         |
|                     | max    | 2.2         | 3.3         | 6.3         | 25.5        | 17.5        | 20.8        | 15.2        | 14.9        | 13.3        | 14.0        | 13.0        | 17.6        | 20.5        | 9.7         | 9.4         | 9.4         | 11.2        |
|                     | mean   | <b>1.9</b>  | <b>2.6</b>  | <b>4.6</b>  | <b>19.4</b> | <b>12.6</b> | <b>14.2</b> | <b>11.0</b> | <b>10.2</b> | <b>9.4</b>  | <b>9.7</b>  | <b>9.3</b>  | <b>9.9</b>  | <b>12.1</b> | <b>7.2</b>  | <b>6.6</b>  | <b>6.7</b>  | <b>7.8</b>  |
|                     | CV [%] | 13.8        | 18.5        | 19.2        | 19.9        | 23.8        | 32.5        | 22.6        | 24.9        | 22.1        | 26.3        | 28.7        | 36.8        | 18.5        | 18.5        | 22.3        | 20.2        | 20.3        |
| <b>Ca</b><br>[mg/L] | min    | 40.9        | 49.8        | 48.6        | 68.6        | 62.1        | 60.8        | 54.5        | 47.8        | 47.1        | 50.6        | 52.8        | 55.7        | 58.6        | 48.5        | 53.1        | 12.7        | 44.2        |
|                     | max    | 66.6        | 85.0        | 92.5        | 108         | 106         | 107         | 93.5        | 82.9        | 89.8        | 107         | 143         | 178         | 185         | 131         | 120         | 125         | 125         |
|                     | mean   | <b>55.6</b> | <b>63.5</b> | <b>71.4</b> | <b>88.5</b> | <b>81.8</b> | <b>81.2</b> | <b>73.6</b> | <b>66.7</b> | <b>71.2</b> | <b>73.2</b> | <b>82.5</b> | <b>93.8</b> | <b>103</b>  | <b>79.8</b> | <b>82.4</b> | <b>74.6</b> | <b>79.5</b> |
|                     | CV [%] | 13.7        | 16.5        | 20.8        | 17.8        | 18.7        | 20.4        | 19.0        | 18.3        | 18.5        | 21.4        | 28.2        | 35.6        | 34.2        | 29.8        | 26.3        | 40.7        | 29.2        |
| <b>Mg</b><br>[mg/L] | min    | 4.5         | 5.5         | 8.0         | 8.3         | 8.6         | 8.7         | 7.5         | 6.5         | 7.3         | 6.7         | 6.8         | 6.6         | 8.3         | 7.9         | 7.6         | 8.7         | 7.5         |
|                     | max    | 8.1         | 10.8        | 13.0        | 12.0        | 12.2        | 13.3        | 13.4        | 13.2        | 12.5        | 13.6        | 16.2        | 17.9        | 19.1        | 17.9        | 18.8        | 19.9        | 20.1        |
|                     | mean   | <b>5.8</b>  | <b>7.5</b>  | <b>10.3</b> | <b>10.0</b> | <b>10.1</b> | <b>10.1</b> | <b>9.3</b>  | <b>8.8</b>  | <b>8.5</b>  | <b>8.6</b>  | <b>9.7</b>  | <b>11.0</b> | <b>13.6</b> | <b>11.9</b> | <b>12.3</b> | <b>12.3</b> | <b>12.5</b> |
|                     | CV [%] | 18.6        | 20.1        | 15.2        | 11.6        | 10.6        | 14.4        | 16.2        | 19.1        | 17.7        | 21.9        | 30.7        | 35.4        | 30.6        | 23.9        | 25.9        | 27.9        | 27.0        |

**Table S5.** Weather conditions (monthly mean values of the air temperature, sunshine duration, and precipitation for the study area [36]).

|             | Temperature [°C] |      | Sunshine duration [h] |      | Precipitation total [mm] |      |
|-------------|------------------|------|-----------------------|------|--------------------------|------|
|             | 2018             | 2019 | 2018                  | 2019 | 2018                     | 2019 |
| <b>XI</b>   | 5                | 3.5  | 35                    | 60   | 40                       | < 10 |
| <b>XII</b>  | 2                | 1    | 30                    | 20   | 35                       | 50   |
| <b>I</b>    | 1                | -2   | 35                    | 20   | 27                       | 40   |
| <b>II</b>   | -4               | 1    | 75                    | 105  | <10                      | 30   |
| <b>III</b>  | 0                | 5.5  | 125                   | 125  | 15                       | 30   |
| <b>IV</b>   | 12.5             | 9.5  | 260                   | 260  | 35                       | <20  |
| <b>V</b>    | 17               | 11.5 | 320                   | 180  | 50                       | 50   |
| <b>VI</b>   | 18               | 21.5 | 250                   | 370  | 30                       | 20   |
| <b>VII</b>  | 19.5             | 17.5 | 240                   | 220  | 85                       | 35   |
| <b>VIII</b> | 19.5             | 20   | 290                   | 260  | 40                       | 35   |
| <b>IX</b>   | 14.5             | 13.5 | 220                   | 160  | 45                       | 65   |
| <b>X</b>    | 9.5              | 10   | 160                   | 130  | 60                       | <30  |

**Table S6.** Results of the determined parameters in the Bzura River water for the individual months in 2018.

| Parameter                  |        | XI          | XII         | I           | II          | III         | IV          | V           | VI          | VII         | VIII        | IX          | X           |
|----------------------------|--------|-------------|-------------|-------------|-------------|-------------|-------------|-------------|-------------|-------------|-------------|-------------|-------------|
| EC<br>[μS/cm]              | min    | 509         | 475         | 493         | 411         | 460         | 380         | 383         | 418         | 365         | 344         | 369         | 266         |
|                            | max    | 1168        | 1282        | 1129        | 1297        | 1292        | 1086        | 1164        | 1271        | 915         | 790         | 1106        | 980         |
|                            | mean   | <b>822</b>  | <b>868</b>  | <b>818</b>  | <b>811</b>  | <b>803</b>  | <b>707</b>  | <b>710</b>  | <b>813</b>  | <b>599</b>  | <b>568</b>  | <b>716</b>  | <b>612</b>  |
|                            | CV [%] | 23.7        | 25.4        | 22.6        | 29.4        | 27.9        | 25.9        | 26.9        | 30.0        | 28.5        | 23.8        | 29.6        | 33.3        |
| temp<br>[°C]               | min    | 5.2         | 1.9         | 0.4         | 0.4         | 3.8         | 12.4        | 16.2        | 18.1        | 17.5        | 17.5        | 15.4        | 9.6         |
|                            | max    | 9.4         | 6.5         | 5.8         | 5.8         | 8.6         | 17.1        | 21.6        | 22.9        | 21.1        | 21.0        | 19.2        | 17.5        |
|                            | mean   | <b>6.8</b>  | <b>4.9</b>  | <b>3.1</b>  | <b>2.2</b>  | <b>5.7</b>  | <b>14.4</b> | <b>18.3</b> | <b>19.9</b> | <b>19.4</b> | <b>18.9</b> | <b>16.7</b> | <b>12.8</b> |
|                            | CV [%] | 17.0        | 34.6        | 43.8        | 66.5        | 25.0        | 10.2        | 11.0        | 7.5         | 5.6         | 5.4         | 7.4         | 17.8        |
| DO<br>[mg/L]               | min    | 7.9         | 7.5         | 9.3         | 8.1         | 6.7         | 3.5         | 3.7         | 1.1         | 1.6         | 2.1         | 3.0         | 4.0         |
|                            | max    | 10.1        | 11.4        | 13.8        | 13.0        | 10.9        | 10.5        | 9.4         | 7.5         | 7.7         | 7.9         | 8.7         | 9.4         |
|                            | mean   | <b>9.3</b>  | <b>10.1</b> | <b>11.9</b> | <b>11.7</b> | <b>10.0</b> | <b>8.4</b>  | <b>7.2</b>  | <b>5.5</b>  | <b>5.5</b>  | <b>5.7</b>  | <b>6.4</b>  | <b>8.0</b>  |
|                            | CV [%] | 8.6         | 9.5         | 9.3         | 10.8        | 11.5        | 20.3        | 17.9        | 33.9        | 33.8        | 35.8        | 29.5        | 18.2        |
| DOC<br>[mg/L]              | min    | 13.1        | 12.3        | 13.4        | 7.9         | 12.1        | 7.6         | 11.7        | 6.7         | 7.2         | 9.0         | 10.3        | 7.4         |
|                            | max    | 27.0        | 24.7        | 25.1        | 19.9        | 27.7        | 31.0        | 43.7        | 27.0        | 18.8        | 24.8        | 17.5        | 33.5        |
|                            | mean   | <b>16.5</b> | <b>19.0</b> | <b>19.1</b> | <b>14.6</b> | <b>17.9</b> | <b>15.2</b> | <b>19.6</b> | <b>13.9</b> | <b>13.6</b> | <b>16.1</b> | <b>13.0</b> | <b>18.3</b> |
|                            | CV [%] | 27.6        | 16.0        | 14.4        | 23.6        | 22.7        | 37.9        | 53.0        | 33.3        | 25.4        | 30.4        | 15.0        | 42.4        |
| NO <sub>3</sub><br>[mg/L]  | min    | n.d.        | 0.3         | n.d.        | 7.7         | 0.2         | 1.8         | n.d.        | 0.2         | 3.8         | 2.3         | 9.5         | 3.6         |
|                            | max    | 86.0        | 79.8        | 78.5        | 112         | 95.1        | 42.5        | 28.7        | 26.5        | 36.0        | 37.4        | 40.7        | 50.4        |
|                            | mean   | <b>27.1</b> | <b>17.5</b> | <b>17.9</b> | <b>38.7</b> | <b>17.1</b> | <b>16.1</b> | <b>7.8</b>  | <b>5.9</b>  | <b>13.1</b> | <b>14.9</b> | <b>24.6</b> | <b>15.6</b> |
|                            | CV [%] | 112         | 156         | 140         | 86.7        | 143         | 63.2        | 95.9        | 115         | 72.7        | 68.9        | 48.5        | 86.9        |
| PO <sub>4</sub><br>[mg/L]  | min    | 0.5         | 0.2         | 0.6         | 0.3         | 0.5         | 0.4         | 0.02        | 0.4         | 0.5         | 0.8         | 0.8         | 0.3         |
|                            | max    | 1.6         | 2.2         | 3.0         | 1.6         | 2.2         | 3.0         | 4.1         | 2.7         | 2.6         | 2.5         | 4.0         | 3.3         |
|                            | mean   | <b>1.2</b>  | <b>1.2</b>  | <b>1.4</b>  | <b>1.1</b>  | <b>1.1</b>  | <b>1.8</b>  | <b>1.7</b>  | <b>1.7</b>  | <b>1.3</b>  | <b>1.8</b>  | <b>2.2</b>  | <b>1.6</b>  |
|                            | CV [%] | 25.7        | 53.3        | 48.1        | 31.2        | 41.1        | 50.0        | 63.1        | 37.1        | 49.5        | 30.9        | 45.3        | 48.5        |
| HCO <sub>3</sub><br>[mg/L] | min    | 163         | 172         | 223         | 151         | 134         | 164         | 125         | 131         | 105         | 118         | 128         | 118         |
|                            | max    | 330         | 328         | 334         | 314         | 311         | 299         | 305         | 308         | 239         | 290         | 430         | 312         |
|                            | mean   | <b>252</b>  | <b>239</b>  | <b>260</b>  | <b>246</b>  | <b>236</b>  | <b>242</b>  | <b>237</b>  | <b>239</b>  | <b>175</b>  | <b>222</b>  | <b>251</b>  | <b>242</b>  |
|                            | CV [%] | 17.0        | 19.9        | 13.2        | 19.3        | 19.3        | 13.7        | 18.2        | 21.1        | 23.1        | 19.6        | 27.6        | 22.4        |
| Cl<br>[mg/L]               | min    | 34.6        | 31.0        | 30.1        | 31.0        | 30.1        | 31.0        | 29.3        | 32.0        | 31.3        | 33.1        | 32.7        | 35.5        |
|                            | max    | 164         | 166         | 105         | 189         | 186         | 180         | 177         | 218         | 167         | 128         | 239         | 258         |
|                            | mean   | <b>76.6</b> | <b>86.1</b> | <b>65.3</b> | <b>78.2</b> | <b>83.5</b> | <b>82.0</b> | <b>76.2</b> | <b>109</b>  | <b>80.5</b> | <b>76.0</b> | <b>119</b>  | <b>124</b>  |
|                            | CV [%] | 42.2        | 40.9        | 30.9        | 51.2        | 48.0        | 47.2        | 49.3        | 47.6        | 48.5        | 38.3        | 49.5        | 51.9        |
| Na<br>[mg/L]               | min    | 14.8        | 15.5        | 15.5        | 13.9        | 15.7        | 13.7        | 14.0        | 14.1        | 14.7        | 8.9         | 15.2        | 16.8        |
|                            | max    | 124         | 127         | 84.4        | 141         | 170         | 157         | 151         | 186         | 131         | 112         | 164         | 195         |
|                            | mean   | <b>46.3</b> | <b>60.3</b> | <b>45.2</b> | <b>53.3</b> | <b>65.5</b> | <b>57.5</b> | <b>56.5</b> | <b>85.8</b> | <b>59.6</b> | <b>53.3</b> | <b>57.6</b> | <b>95.8</b> |
|                            | CV [%] | 59.4        | 50.9        | 39.7        | 65.6        | 60.3        | 62.5        | 62.5        | 56.8        | 57.0        | 58.0        | 50.9        | 56.0        |
| K<br>[mg/L]                | min    | 1.8         | 1.7         | 1.7         | 2.0         | 1.9         | 1.5         | 1.4         | 1.7         | 1.8         | 1.9         | 2.1         | 1.9         |
|                            | max    | 14.2        | 15.2        | 15.4        | 14.8        | 19.4        | 15.0        | 19.8        | 21.3        | 14.4        | 57.0        | 20.2        | 21.9        |
|                            | mean   | <b>7.1</b>  | <b>7.9</b>  | <b>7.5</b>  | <b>7.3</b>  | <b>8.6</b>  | <b>7.2</b>  | <b>9.0</b>  | <b>10.8</b> | <b>8.0</b>  | <b>11.9</b> | <b>12.0</b> | <b>12.1</b> |
|                            | CV [%] | 40.9        | 41.3        | 44.5        | 44.5        | 51.2        | 45.4        | 51.9        | 52.3        | 47.5        | 118         | 47.8        | 50.7        |
| Ca<br>[mg/L]               | min    | 58.7        | 67.9        | 68.3        | 110         | 78.3        | 45.5        | 80.9        | 120         | 15.2        | 68.7        | 52.5        | 51.8        |
|                            | max    | 171         | 180         | 226         | 196         | 132         | 124         | 141         | 194         | 55.7        | 169         | 116         | 116         |
|                            | mean   | <b>103</b>  | <b>101</b>  | <b>114</b>  | <b>134</b>  | <b>104</b>  | <b>99</b>   | <b>106</b>  | <b>161</b>  | <b>34.8</b> | <b>96.4</b> | <b>88.0</b> | <b>92.8</b> |
|                            | CV [%] | 33.7        | 30.5        | 37.9        | 18.6        | 14.7        | 26.1        | 14.9        | 12.7        | 28.7        | 25.3        | 16.2        | 19.6        |
| Mg<br>[mg/L]               | min    | 8.2         | 3.9         | 5.4         | 4.1         | 4.2         | 2.3         | 7.2         | 4.5         | 4.9         | 4.8         | 5.5         | 6.6         |
|                            | max    | 25.9        | 17.0        | 26.3        | 17.5        | 14.6        | 7.1         | 20.4        | 13.9        | 9.8         | 9.7         | 12.0        | 34.6        |
|                            | mean   | <b>16.6</b> | <b>9.2</b>  | <b>14.2</b> | <b>10.1</b> | <b>8.1</b>  | <b>4.7</b>  | <b>13.5</b> | <b>9.0</b>  | <b>6.6</b>  | <b>7.1</b>  | <b>8.8</b>  | <b>12.0</b> |
|                            | CV [%] | 30.9        | 40.6        | 40.2        | 34.1        | 31.8        | 26.9        | 24.8        | 29.2        | 20.5        | 22.0        | 19.4        | 58.5        |

**Table S7.** Results of the determined parameters in the Bzura River water for the individual months in 2019 (for 13 sampling sites).

| Parameter                  |        | XI          | XII         | I           | II          | III         | IV          | V           | VI          | VII         | VIII        | IX          | X           |
|----------------------------|--------|-------------|-------------|-------------|-------------|-------------|-------------|-------------|-------------|-------------|-------------|-------------|-------------|
| EC<br>[μS/cm]              | min    | 334         | 327         | 345         | 338         | 367         | 315         | 350         | 389         | 378         | 410         | 408         | 399         |
|                            | max    | 864         | 737         | 1109        | 975         | 1068        | 1047        | 1098        | 1206        | 1226        | 1280        | 1405        | 1198        |
|                            | mean   | <b>568</b>  | <b>483</b>  | <b>666</b>  | <b>658</b>  | <b>652</b>  | <b>638</b>  | <b>656</b>  | <b>724</b>  | <b>721</b>  | <b>722</b>  | <b>731</b>  | <b>680</b>  |
|                            | CV [%] | 23.5        | 19.1        | 28.8        | 21.3        | 23.7        | 28.1        | 26.4        | 28.8        | 29.9        | 34.8        | 36.0        | 30.0        |
| temp<br>[°C]               | min    | 8.8         | 1.5         | 1.4         | 1.9         | 5.9         | 5.5         | 10.4        | 14.7        | 12.2        | 16.8        | 11.0        | 12.4        |
|                            | max    | 11.6        | 7.9         | 6.5         | 7.3         | 11.7        | 13.2        | 15.1        | 23.4        | 21.7        | 21.6        | 16.5        | 18.3        |
|                            | mean   | <b>9.7</b>  | <b>4.4</b>  | <b>2.9</b>  | <b>4.1</b>  | <b>7.6</b>  | <b>9.2</b>  | <b>11.7</b> | <b>19.2</b> | <b>17.2</b> | <b>19.6</b> | <b>12.9</b> | <b>14.4</b> |
|                            | CV [%] | 6.9         | 41.2        | 49.8        | 34.9        | 17.4        | 16.8        | 10.3        | 15.7        | 12.9        | 5.3         | 10.7        | 10.3        |
| DO<br>[mg/L]               | min    | 6.6         | 7.4         | 8.0         | 7.3         | 6.7         | 5.5         | 4.8         | 3.0         | 3.9         | 2.9         | 2.8         | 5.6         |
|                            | max    | 9.5         | 11.3        | 10.9        | 9.9         | 9.8         | 9.9         | 9.3         | 7.2         | 9.1         | 9.2         | 10.6        | 11.4        |
|                            | mean   | <b>8.6</b>  | <b>9.9</b>  | <b>10.0</b> | <b>9.3</b>  | <b>8.9</b>  | <b>8.7</b>  | <b>7.4</b>  | <b>5.7</b>  | <b>7.0</b>  | <b>5.7</b>  | <b>7.7</b>  | <b>7.7</b>  |
|                            | CV [%] | 9.0         | 9.1         | 8.1         | 6.4         | 8.7         | 12.8        | 13.2        | 18.7        | 22.7        | 28.9        | 22.9        | 17.0        |
| DOC<br>[mg/L]              | min    | 8.1         | 7.8         | 8.5         | 9.8         | 11.1        | 12.9        | 9.1         | 8.5         | 10.0        | 9.0         | 10.6        | 15.3        |
|                            | max    | 28.5        | 17.9        | 21.3        | 24.0        | 25.0        | 26.8        | 19.7        | 23.0        | 28.3        | 27.2        | 32.0        | 35.4        |
|                            | mean   | <b>12.8</b> | <b>12.6</b> | <b>16.5</b> | <b>14.8</b> | <b>15.3</b> | <b>16.6</b> | <b>11.8</b> | <b>14.2</b> | <b>16.3</b> | <b>14.9</b> | <b>17.9</b> | <b>23.8</b> |
|                            | CV [%] | 38.4        | 19.0        | 24.3        | 24.4        | 24.0        | 22.0        | 22.8        | 29.3        | 28.5        | 40.6        | 31.5        | 22.9        |
| NO <sub>3</sub><br>[mg/L]  | min    | 12.7        | 0.4         | 2.9         | 1.6         | 1.6         | 0.2         | 0.4         | 0.8         | 2.4         | 1.4         | 0.5         | 0.4         |
|                            | max    | 100.7       | 19.9        | 61.0        | 126.5       | 64.2        | 31.6        | 9.1         | 16.8        | 14.2        | 13.3        | 22.8        | 18.9        |
|                            | mean   | <b>33.2</b> | <b>9.2</b>  | <b>22.4</b> | <b>39.5</b> | <b>23.2</b> | <b>8.4</b>  | <b>3.5</b>  | <b>6.8</b>  | <b>7.7</b>  | <b>5.7</b>  | <b>7.3</b>  | <b>5.9</b>  |
|                            | CV [%] | 73.3        | 70.8        | 81.7        | 111.7       | 102.8       | 93.7        | 80.7        | 55.9        | 43.0        | 62.5        | 85.2        | 80.4        |
| PO <sub>4</sub><br>[mg/L]  | min    | 0.5         | 0.6         | 0.2         | 0.4         | 0.2         | 0.2         | 0.5         | 0.2         | 0.2         | 0.6         | 0.3         | 0.5         |
|                            | max    | 3.2         | 3.9         | 3.7         | 1.5         | 1.3         | 4.1         | 2.4         | 3.2         | 3.9         | 3.1         | 2.2         | 2.5         |
|                            | mean   | <b>1.7</b>  | <b>1.5</b>  | <b>1.3</b>  | <b>0.9</b>  | <b>0.6</b>  | <b>1.5</b>  | <b>1.6</b>  | <b>1.5</b>  | <b>1.6</b>  | <b>1.9</b>  | <b>1.2</b>  | <b>1.4</b>  |
|                            | CV [%] | 46.0        | 49.2        | 63.4        | 40.4        | 56.0        | 71.2        | 37.2        | 45.3        | 64.7        | 42.2        | 48.5        | 37.8        |
| HCO <sub>3</sub><br>[mg/L] | min    | 150         | 175         | 182         | 192         | 155         | 152         | 128         | 156         | 175         | 132         | 145         | 180         |
|                            | max    | 294         | 287         | 284         | 296         | 343         | 326         | 325         | 333         | 330         | 329         | 341         | 293         |
|                            | mean   | <b>240</b>  | <b>228</b>  | <b>239</b>  | <b>238</b>  | <b>251</b>  | <b>254</b>  | <b>253</b>  | <b>259</b>  | <b>245</b>  | <b>245</b>  | <b>242</b>  | <b>240</b>  |
|                            | CV [%] | 13.3        | 16.3        | 12.9        | 12.2        | 16.3        | 15.8        | 16.6        | 16.8        | 19.0        | 18.3        | 17.7        | 10.2        |
| Cl<br>[mg/L]               | min    | 34.5        | 25.1        | 36.2        | 37.9        | 36.2        | 36.7        | 36.5        | 37.6        | 38.6        | 40.8        | 36.9        | 40.0        |
|                            | max    | 187         | 182         | 339         | 220         | 236         | 236         | 234         | 267         | 270         | 286         | 340         | 258         |
|                            | mean   | <b>87.8</b> | <b>79.1</b> | <b>128</b>  | <b>100</b>  | <b>91.0</b> | <b>94.1</b> | <b>98.0</b> | <b>120</b>  | <b>119</b>  | <b>121</b>  | <b>125</b>  | <b>107</b>  |
|                            | CV [%] | 46.3        | 44.3        | 69.0        | 45.2        | 51.1        | 49.8        | 48.7        | 49.4        | 50.6        | 60.1        | 63.9        | 52.3        |
| Na<br>[mg/L]               | min    | 14.4        | 15.8        | 17.6        | 17.4        | 14.0        | 15.         | 18.4        | 15.2        | 17.8        | 14.7        | 15.1        | 18.5        |
|                            | max    | 142         | 127         | 249         | 149         | 165         | 198         | 18          | 224         | 290         | 239         | 235         | 251         |
|                            | mean   | <b>61.6</b> | <b>52.5</b> | <b>88.9</b> | <b>56.0</b> | <b>55.3</b> | <b>69.4</b> | <b>69.8</b> | <b>77.5</b> | <b>115</b>  | <b>93.3</b> | <b>95.6</b> | <b>90.3</b> |
|                            | CV [%] | 55.8        | 49.2        | 80.1        | 65.1        | 66.0        | 64.1        | 55.5        | 63.6        | 60.9        | 72.1        | 68.4        | 68.9        |
| K<br>[mg/L]                | min    | 1.6         | 2.0         | 1.9         | 2.1         | 1.6         | 1.7         | 1.5         | 1.7         | 2.1         | 2.1         | 2.1         | 2.2         |
|                            | max    | 15.4        | 14.1        | 14.8        | 16.1        | 17.0        | 19.0        | 20.3        | 24.1        | 22.3        | 21.6        | 26.5        | 22.1        |
|                            | mean   | <b>8.6</b>  | <b>7.3</b>  | <b>7.2</b>  | <b>7.0</b>  | <b>7.2</b>  | <b>8.4</b>  | <b>8.9</b>  | <b>11.1</b> | <b>11.6</b> | <b>10.9</b> | <b>11.4</b> | <b>10.0</b> |
|                            | CV [%] | 40.9        | 37.6        | 41.8        | 44.4        | 46.5        | 48.4        | 48.9        | 52.9        | 47.9        | 52.1        | 59.8        | 53.2        |
| Ca<br>[mg/L]               | min    | 63.8        | 52.3        | 12.7        | 47.8        | 66.6        | 40.9        | 61.0        | 50.1        | 50.6        | 44.2        | 48.5        | 54.2        |
|                            | max    | 111.4       | 94.1        | 139         | 131         | 185         | 107         | 122         | 81.5        | 97.5        | 75.1        | 107         | 95.4        |
|                            | mean   | <b>87.5</b> | <b>71.9</b> | <b>90.1</b> | <b>79.8</b> | <b>106</b>  | <b>69.3</b> | <b>86.4</b> | <b>63.7</b> | <b>72.0</b> | <b>61.2</b> | <b>78.1</b> | <b>67.6</b> |
|                            | CV [%] | 16.7        | 17.5        | 31.4        | 38.8        | 31.5        | 28.9        | 16.4        | 14.4        | 18.0        | 14.0        | 22.8        | 15.7        |
| Mg<br>[mg/L]               | min    | 4.7         | 5.7         | 8.1         | 7.0         | 6.5         | 6.4         | 5.3         | 4.5         | 4.7         | 6.0         | 5.2         | 5.2         |
|                            | max    | 10.9        | 11.4        | 17.8        | 20.1        | 19.0        | 16.3        | 18.9        | 11.4        | 12.7        | 12.0        | 11.2        | 11.1        |
|                            | mean   | <b>8.3</b>  | <b>8.6</b>  | <b>13.3</b> | <b>13.5</b> | <b>12.2</b> | <b>11.4</b> | <b>10.0</b> | <b>8.6</b>  | <b>9.0</b>  | <b>9.5</b>  | <b>8.9</b>  | <b>8.5</b>  |
|                            | CV [%] | 17.1        | 16.8        | 16.3        | 32.8        | 29.1        | 25.5        | 32.4        | 21.0        | 25.8        | 21.2        | 18.5        | 15.3        |

**Table S8.** Hydrological conditions (parameters read on the sampling days based on the measurement data on the gauging station at point 11 [61]).

|             | Water level [cm] |      | Flow rate [m <sup>3</sup> /s] |      |
|-------------|------------------|------|-------------------------------|------|
|             | 2018             | 2019 | 2018                          | 2019 |
| <b>XI</b>   | 130              | 87   | 3.6                           | 0.8  |
| <b>XII</b>  | 136              | 112  | 4.1                           | 2.4  |
| <b>I</b>    | 113              | 113  | 2.1                           | 2.6  |
| <b>II</b>   | 115              | 120  | 2.3                           | 3.3  |
| <b>III</b>  | 100              | 107  | 1.5                           | 2.4  |
| <b>IV</b>   | 96               | 90   | 1.3                           | 1.0  |
| <b>V</b>    | 88               | 83   | 0.8                           | 0.8  |
| <b>VI</b>   | 76               | 71   | 0.6                           | 0.5  |
| <b>VII</b>  | 155              | 83   | 6.7                           | 0.8  |
| <b>VIII</b> | 79               | 75   | 0.6                           | 0.6  |
| <b>IX</b>   | 76               | 81   | 0.5                           | 0.7  |
| <b>X</b>    | 77               | 91   | 0.6                           | 1.1  |



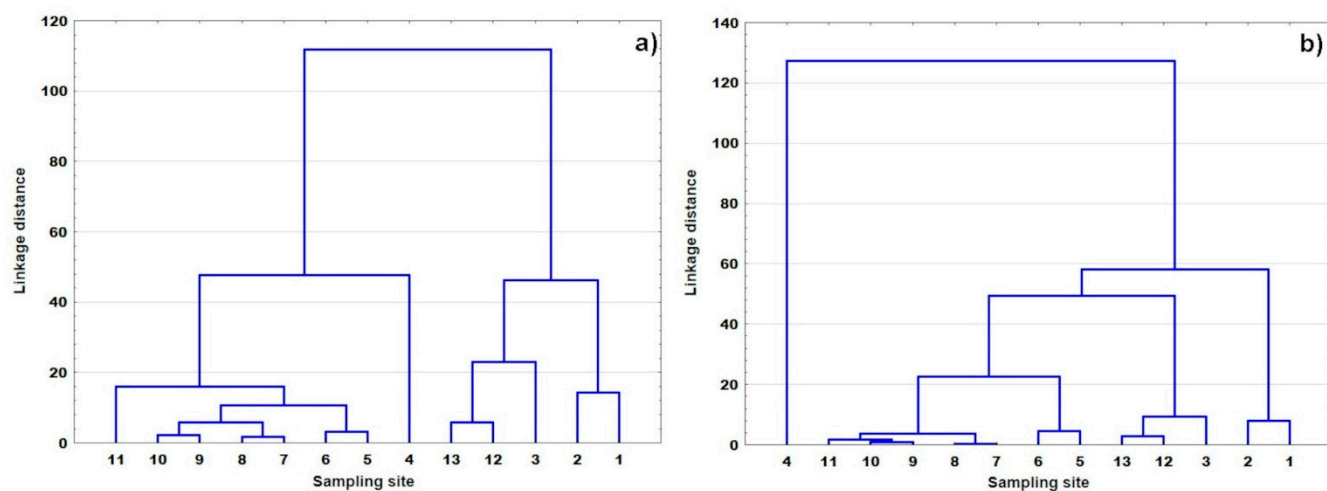

**Figure S1.** Dendrograms depicting the clustering of sampling sites in (a) 2018 and (b) 2019 for temperature.

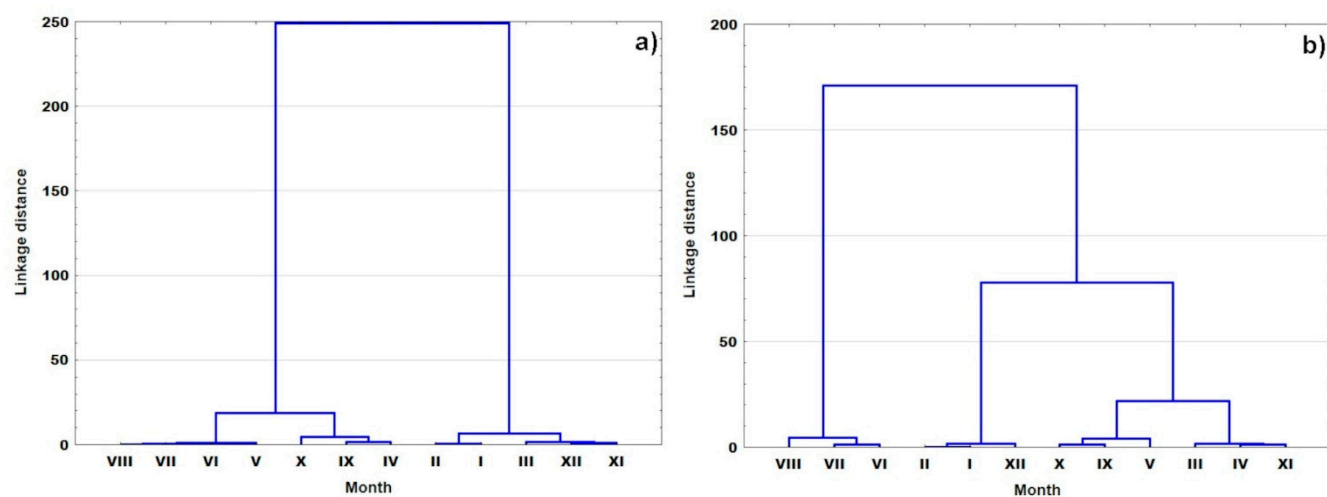

**Figure S2.** Dendrograms depicting the clustering of months in (a) 2018 and (b) 2019 for temperature.

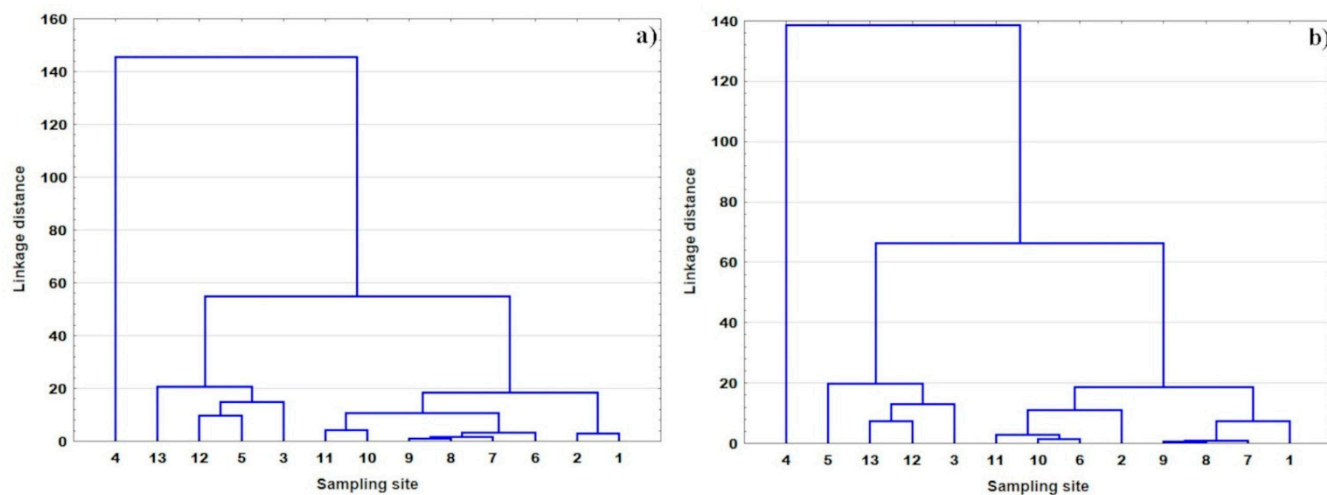

**Figure S3.** Dendrograms depicting the clustering of sampling sites in (a) 2018 and (b) 2019 for dissolved oxygen.

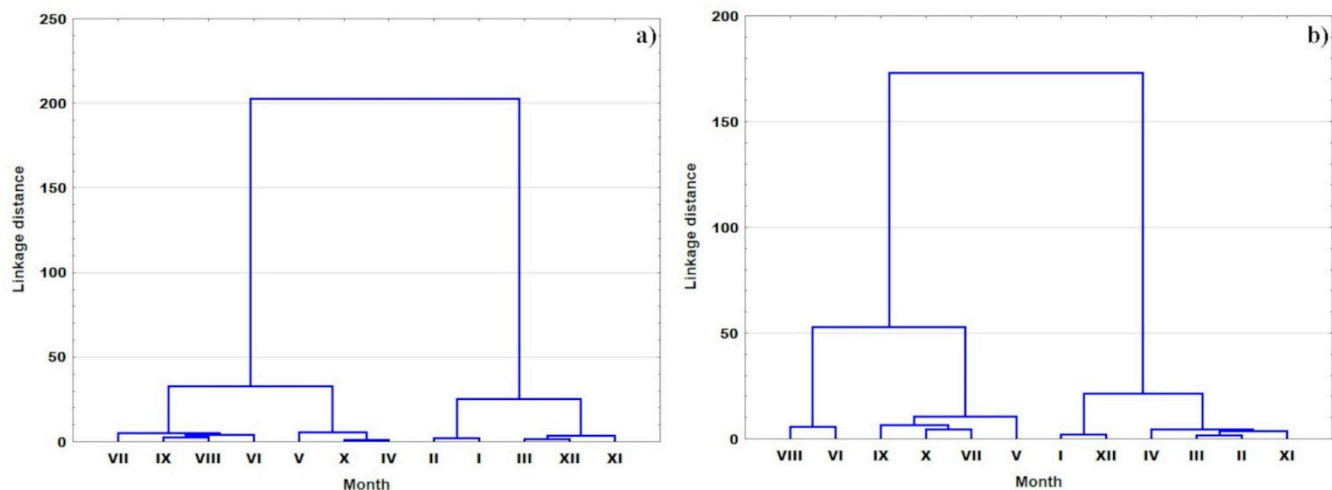

**Figure S4.** Dendrograms depicting the clustering of months in (a) 2018 and (b) 2019 for dissolved oxygen.

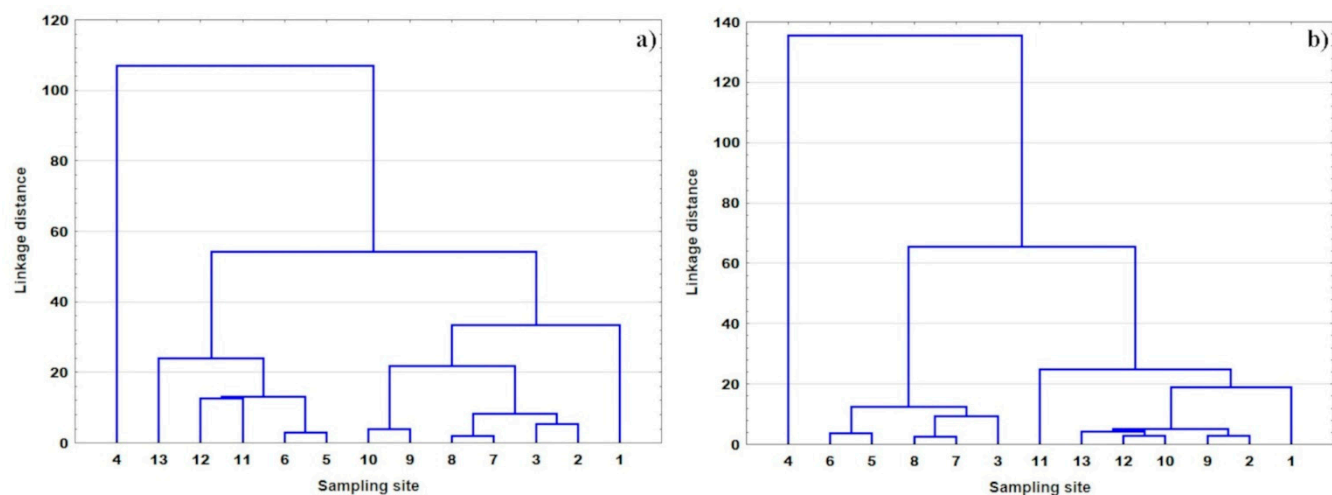

**Figure S5.** Dendrograms depicting the clustering of sampling sites in (a) 2018 and (b) 2019 for DOC.

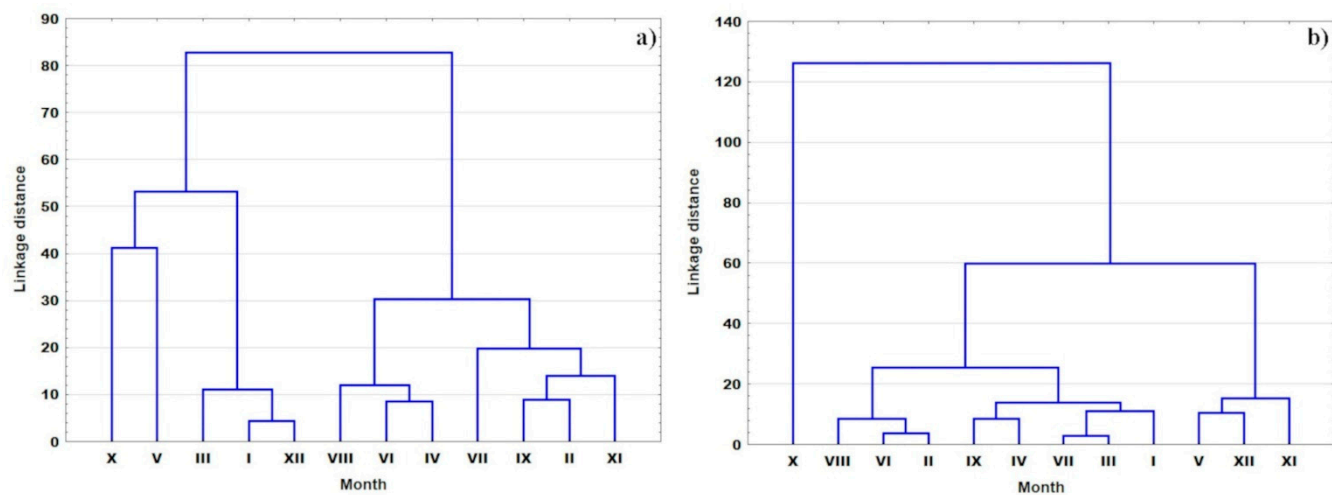

**Figure S6.** Dendrograms depicting the clustering of months in (a) 2018 and (b) 2019 for DOC.

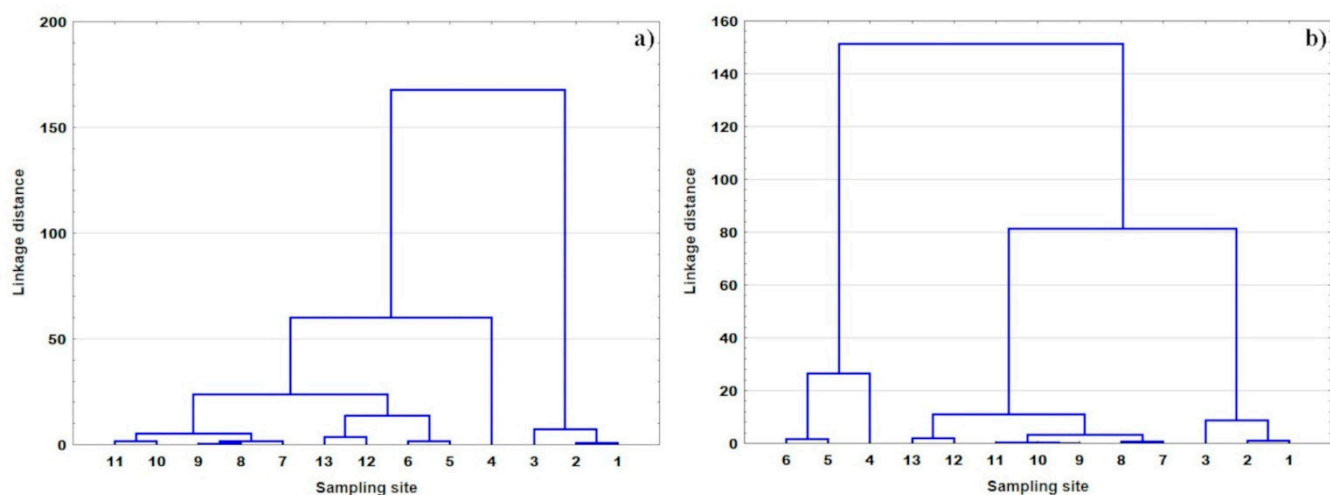

**Figure S7.** Dendrograms depicting the clustering of sampling sites in (a) 2018 and (b) 2019 for electrical conductivity.

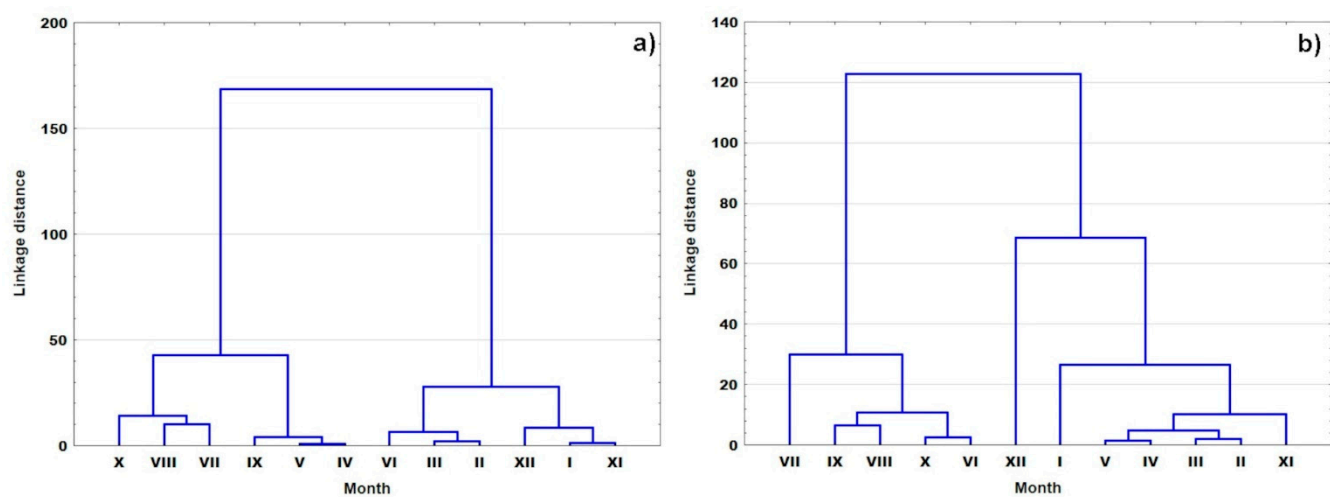

**Figure S8.** Dendrograms depicting the clustering of months in (a) 2018 and (b) 2019 for electrical conductivity.

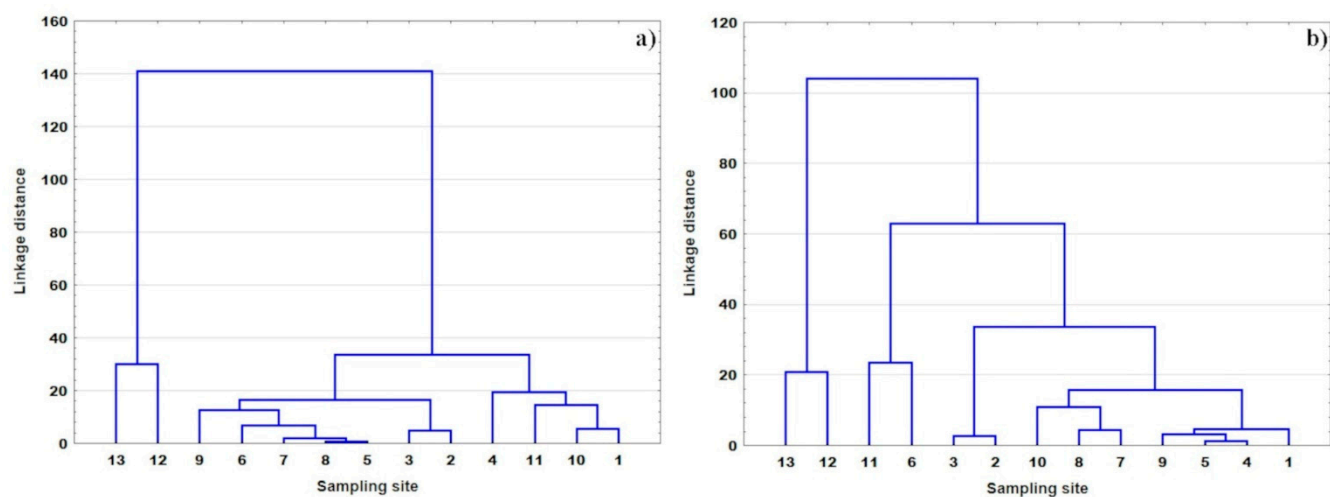

**Figure S9.** Dendrograms depicting the clustering of sampling sites in (a) 2018 and (b) 2019 for nitrates.

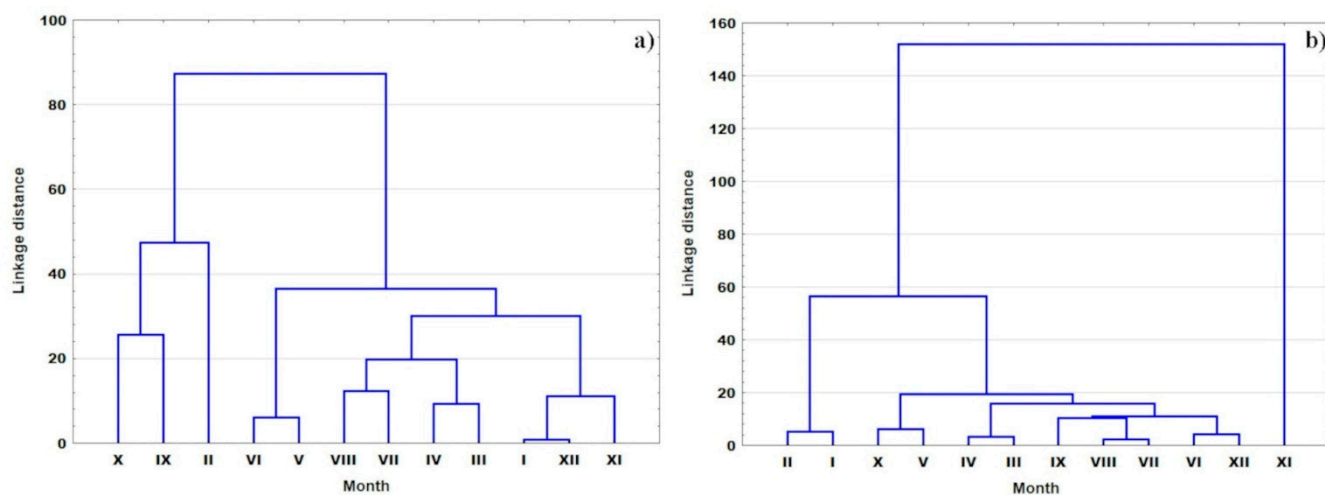

**Figure S10.** Dendrograms depicting the clustering of months in (a) 2018 and (b) 2019 for nitrates.

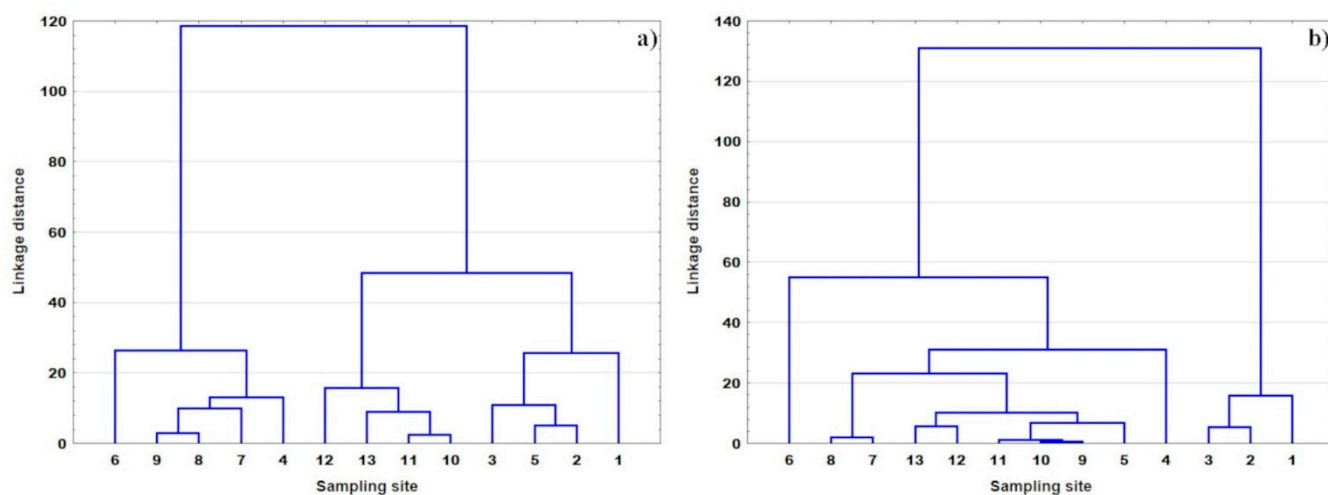

**Figure S11.** Dendrograms depicting the clustering of sampling sites in (a) 2018 and (b) 2019 for phosphates.

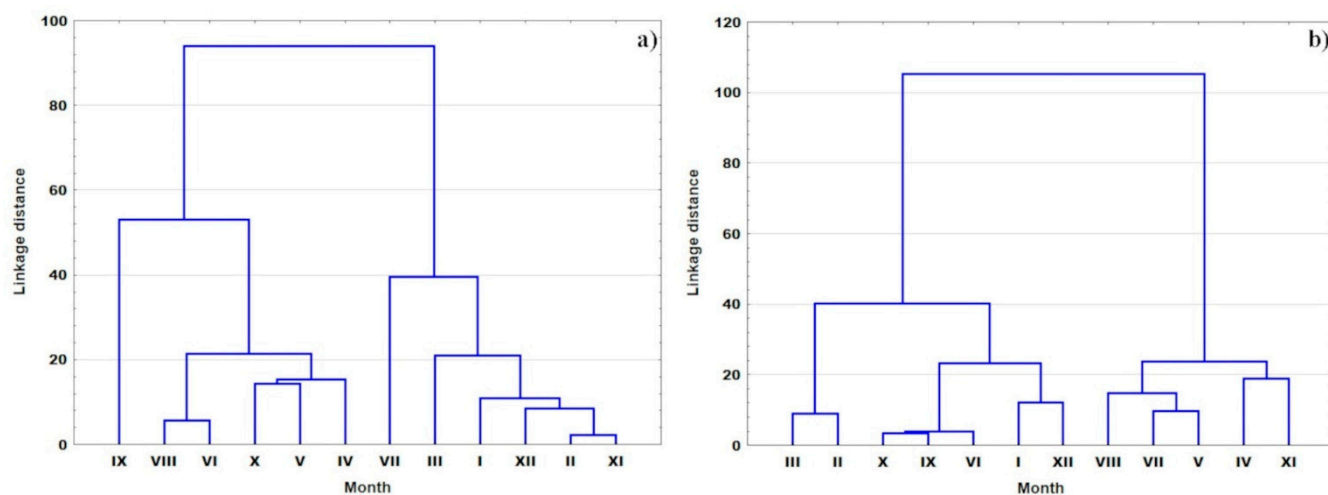

**Figure S12.** Dendrograms depicting the clustering of months in (a) 2018 and (b) 2019 for phosphates.

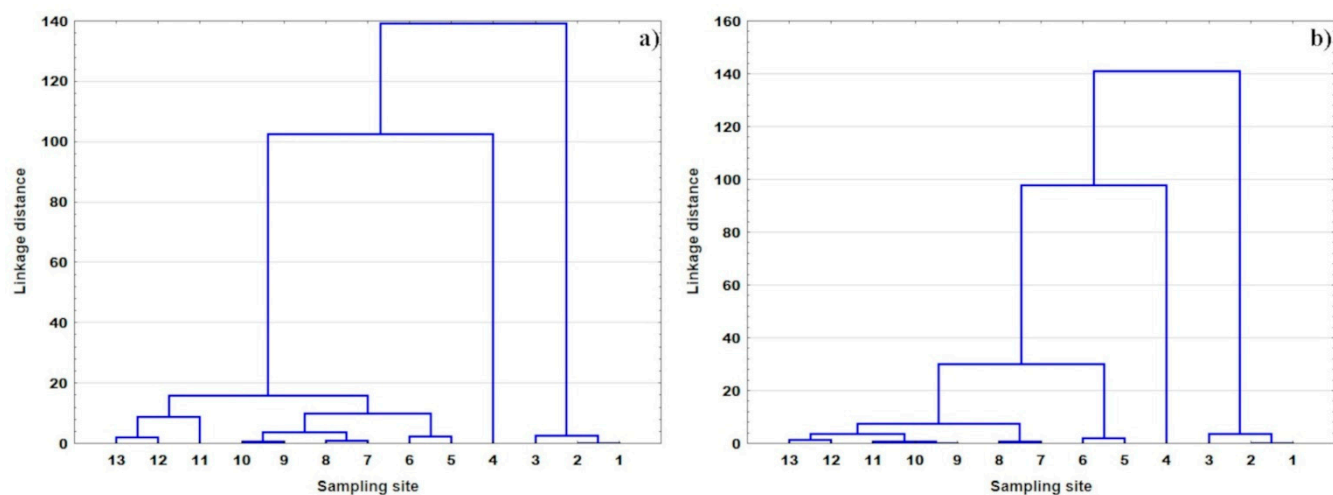

**Figure S13.** Dendrograms depicting the clustering of sampling sites in (a) 2018 and (b) 2019 for sodium.

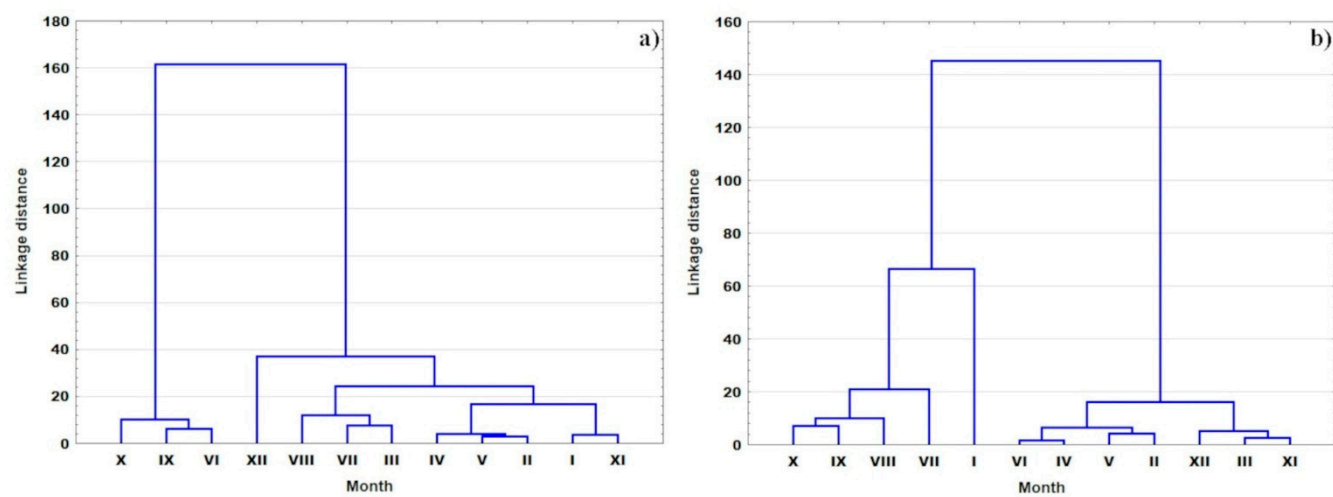

**Figure S14.** Dendrograms depicting the clustering of months in (a) 2018 and (b) 2019 for sodium.

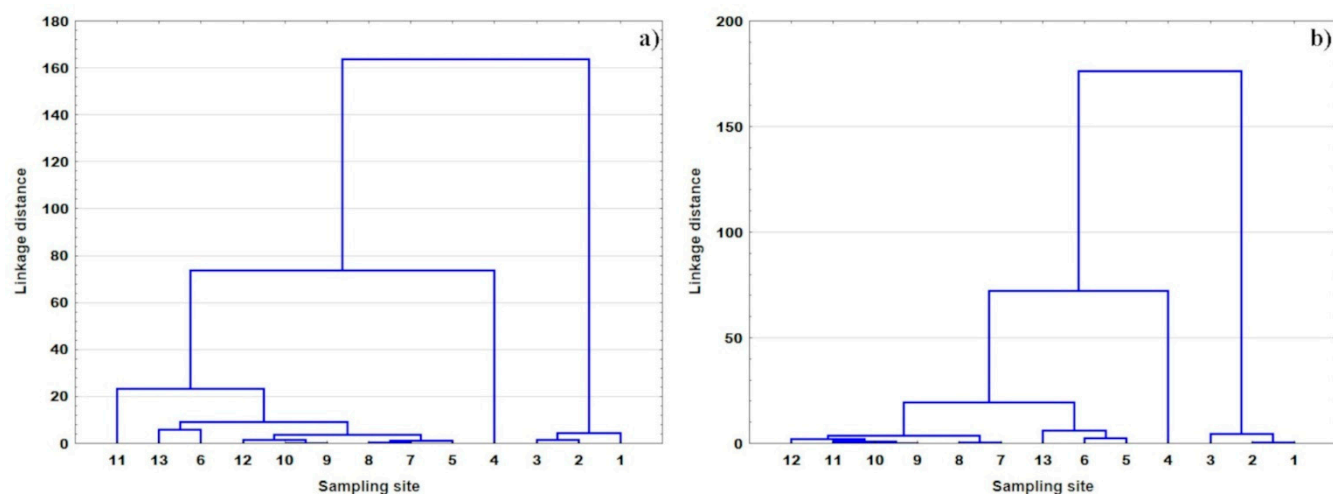

**Figure S15.** Dendrograms depicting the clustering of sampling sites in (a) 2018 and (b) 2019 for potassium.

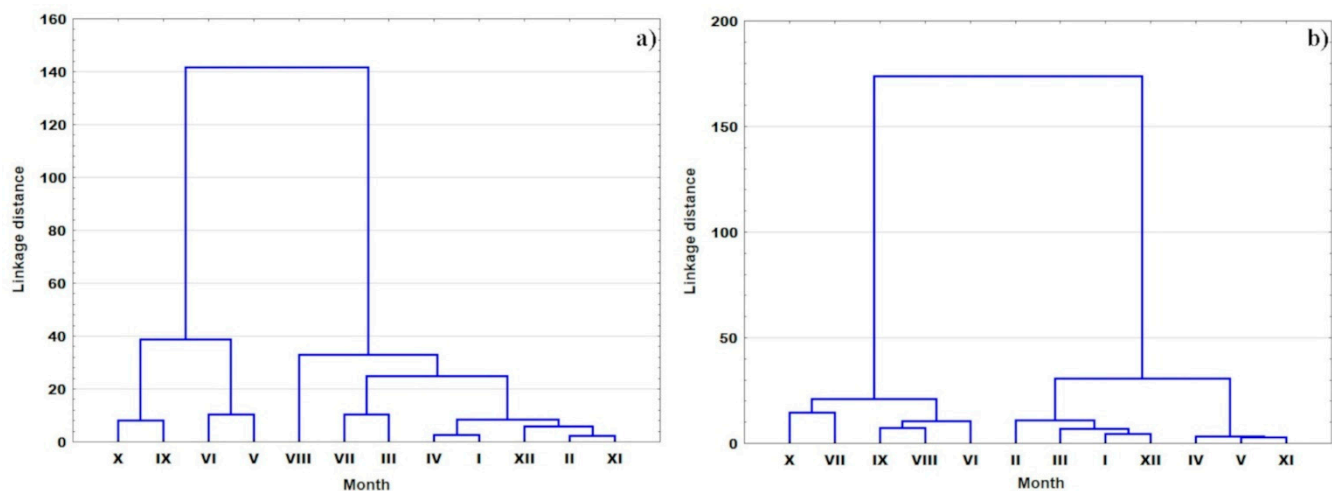

**Figure S16.** Dendrograms depicting the clustering of months in (a) 2018 and (b) 2019 for potassium.

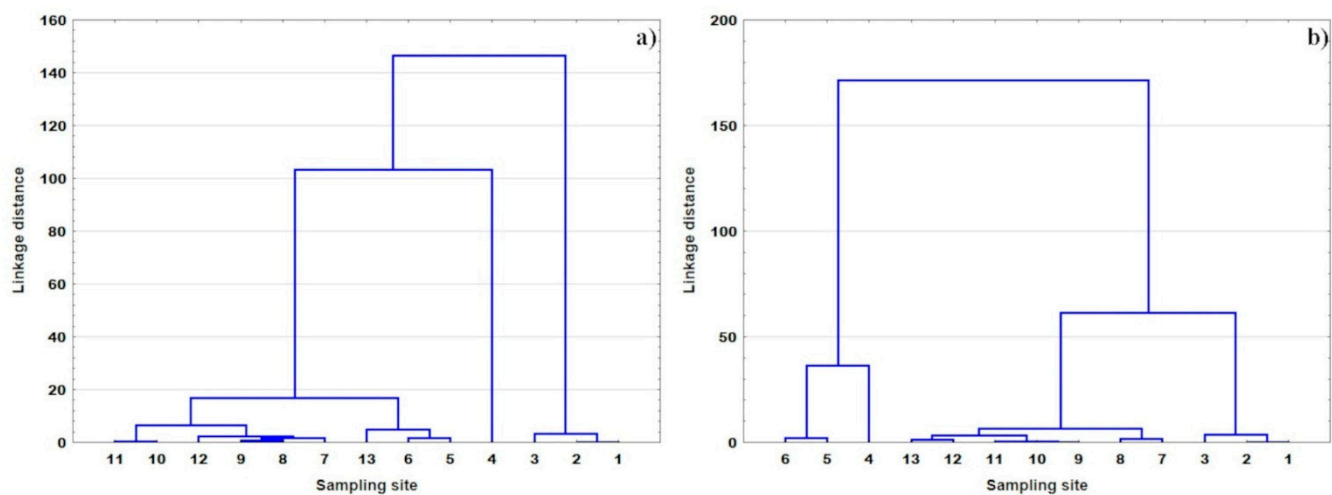

**Figure S17.** Dendrograms depicting the clustering of sampling sites in (a) 2018 and (b) 2019 for chlorides.

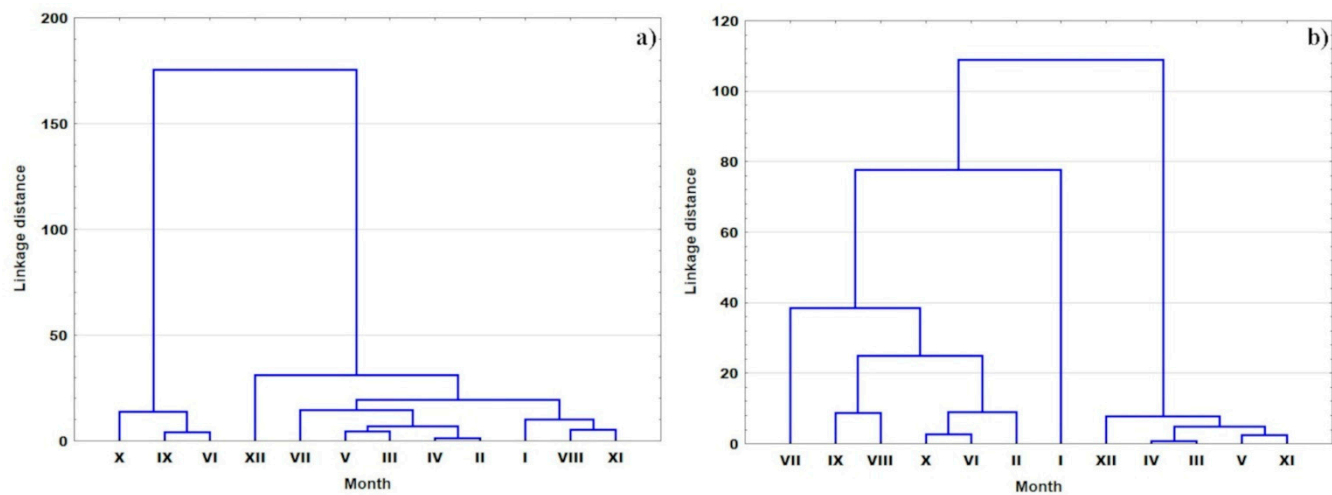

**Figure S18.** Dendrograms depicting the clustering of months in (a) 2018 and (b) 2019 for chlorides.

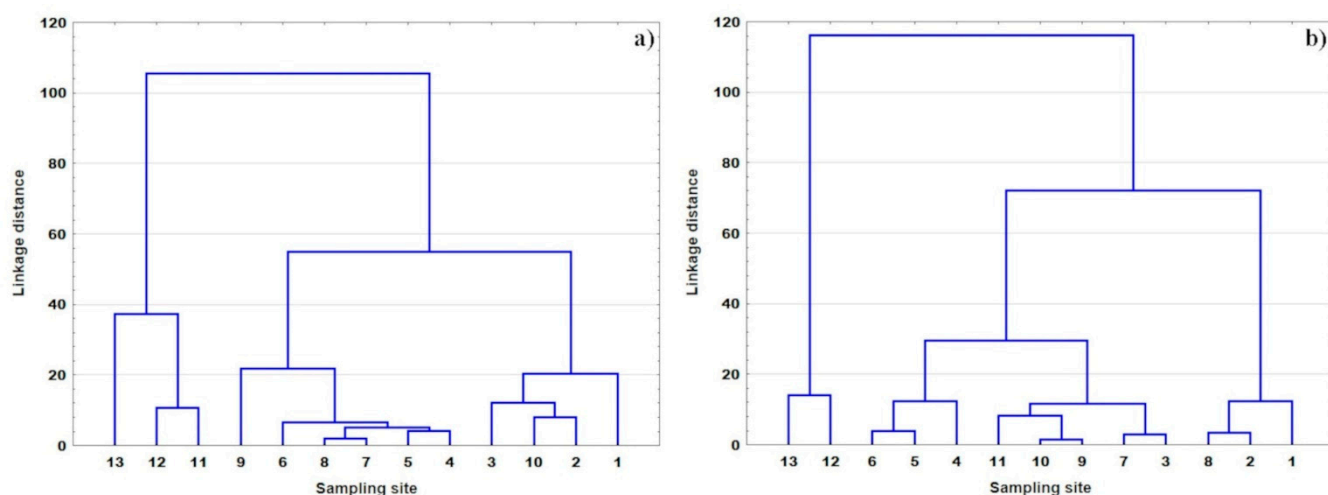

**Figure S19.** Dendrograms depicting the clustering of sampling sites in (a) 2018 and (b) 2019 for calcium.

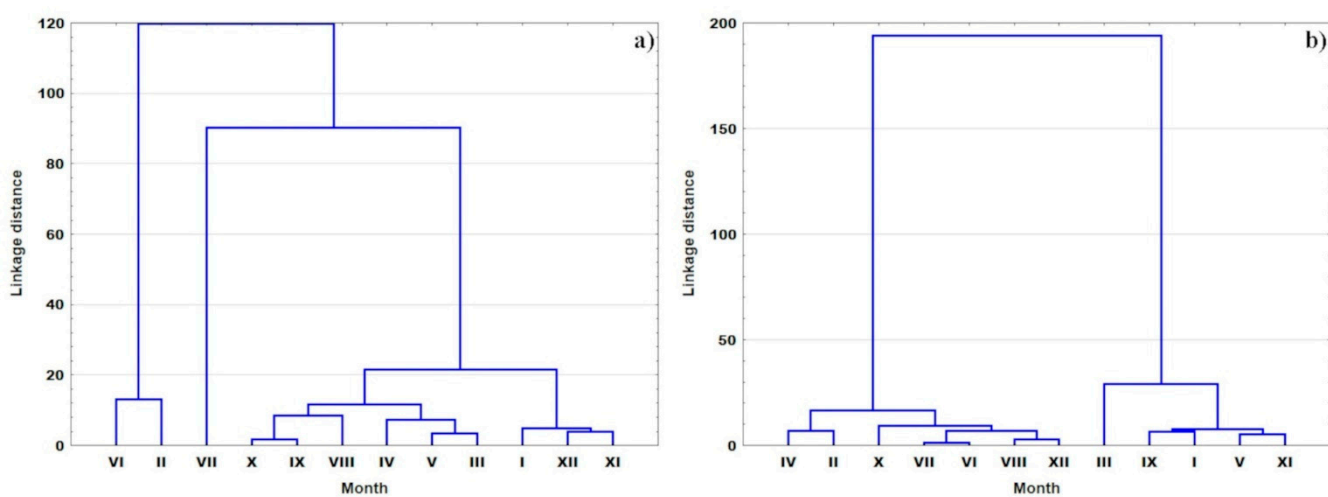

**Figure S20.** Dendrograms depicting the clustering of months in (a) 2018 and (b) 2019 for calcium.

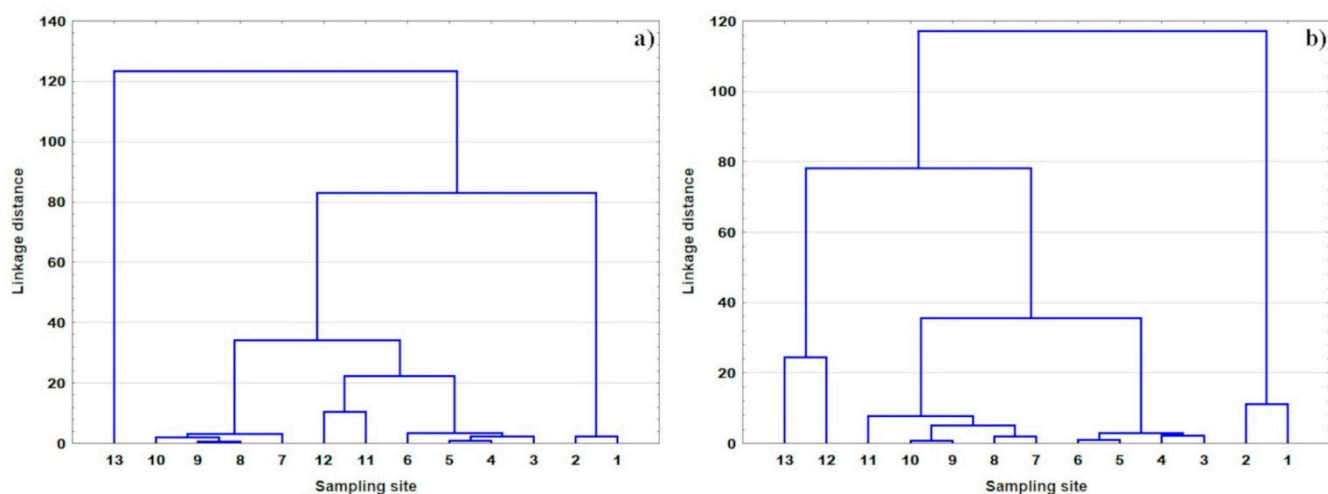

**Figure S21.** Dendrograms depicting the clustering of sampling sites in (a) 2018 and (b) 2019 for magnesium.



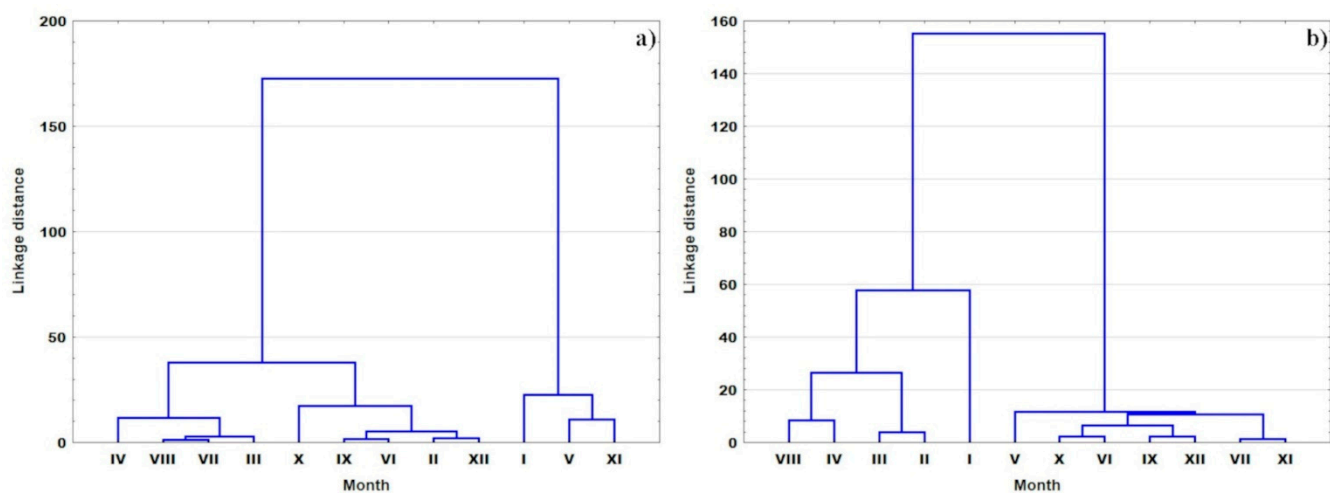

**Figure S22.** Dendrograms depicting the clustering of months in (a) 2018 and (b) 2019 for magnesium.

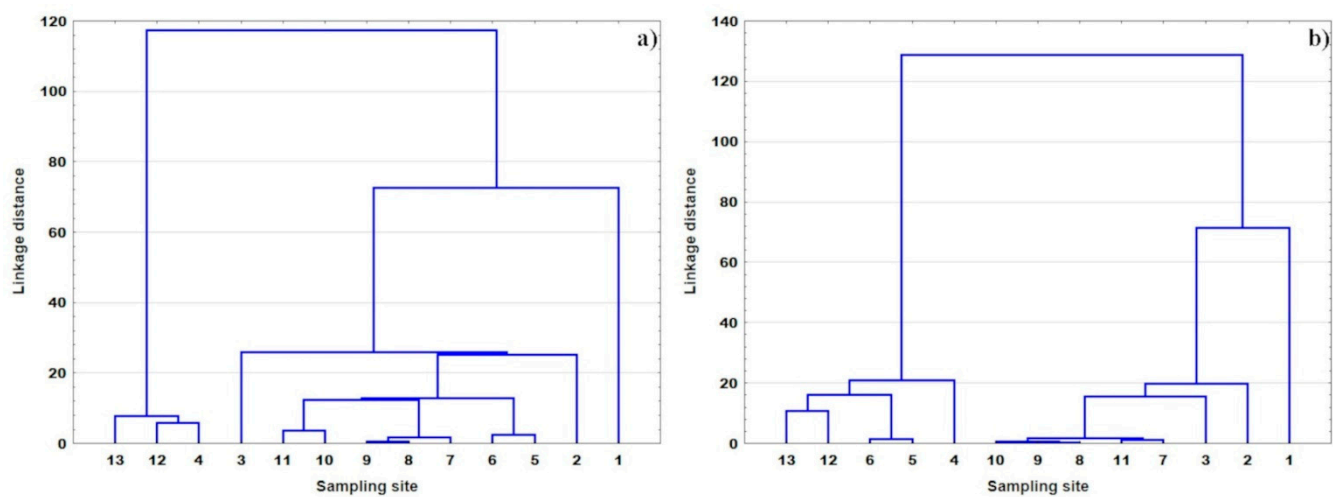

**Figure S23.** Dendrograms depicting the clustering of sampling sites in (a) 2018 and (b) 2019 for bicarbonates.

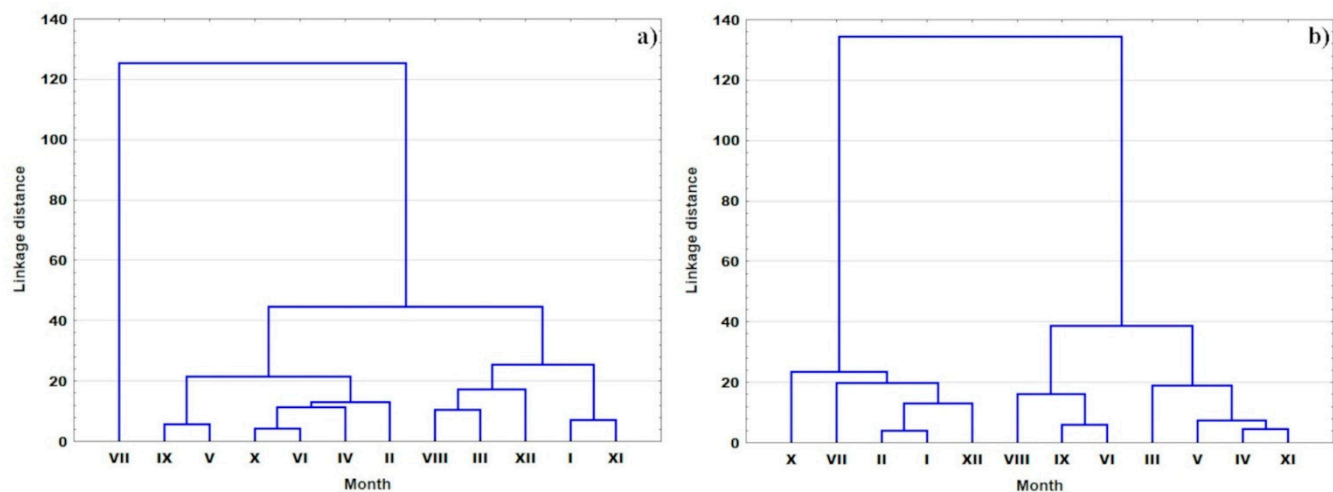

**Figure S24.** Dendrograms depicting the clustering of months in (a) 2018 and (b) 2019 for bicarbonates.



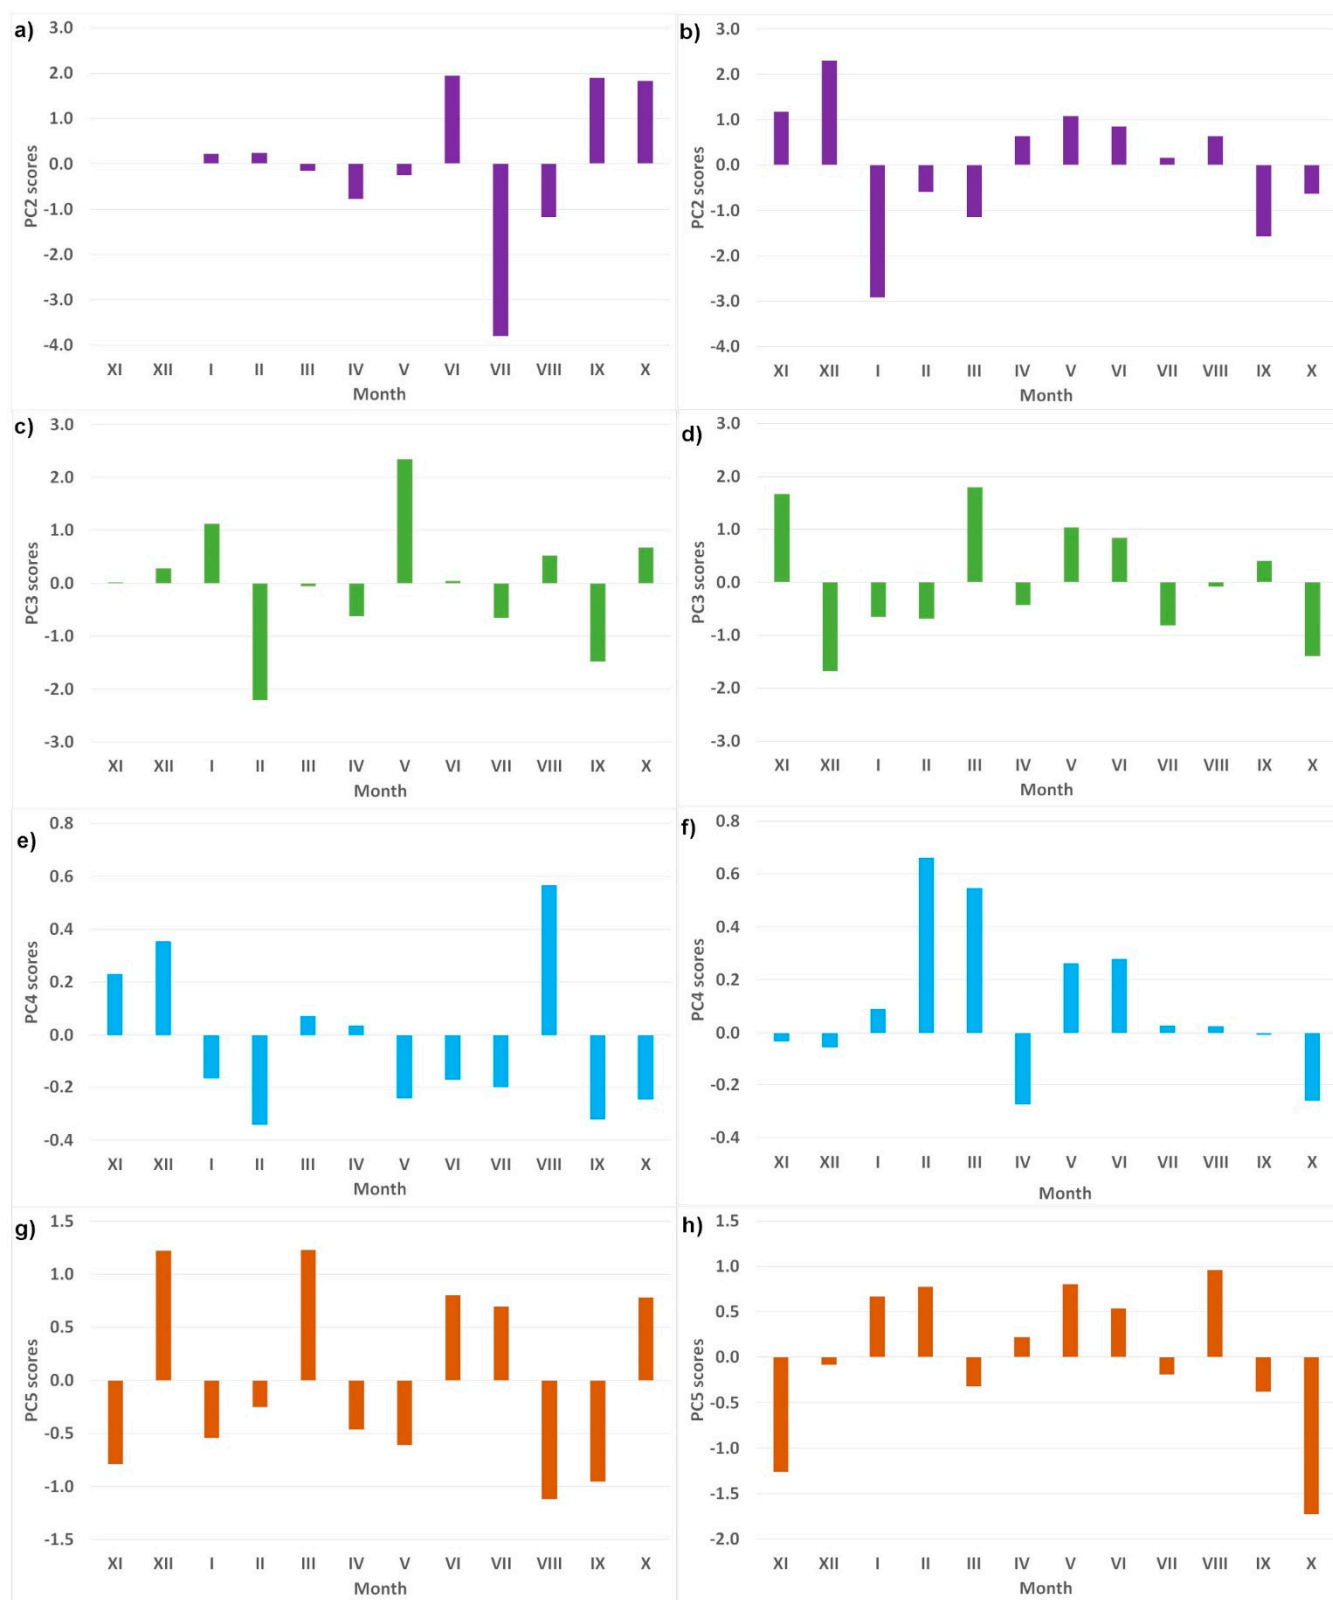

**Figure S25.** Score values of PC2, PC3, PC4, and PC5 in (a,b,c,d) 2018 and (e,f,g,h) 2019 for the individual months.

**Table S9.** Factor loadings of variables calculated based on the monthly average values of the determined parameters for 2018 and 2019.

|                         | 2018  |       |       |       |       | 2019  |       |       |       |       |
|-------------------------|-------|-------|-------|-------|-------|-------|-------|-------|-------|-------|
|                         | PC1   | PC2   | PC3   | PC4   | PC5   | PC1   | PC2   | PC3   | PC4   | PC5   |
| Eigenvalue              | 5.3   | 2.5   | 1.4   | 0.9   | 0.8   | 5.9   | 2.0   | 1.3   | 1.0   | 0.7   |
| % of the total variance | 44.3  | 20.7  | 11.7  | 7.9   | 6.4   | 49.6  | 17.1  | 11.0  | 8.6   | 5.9   |
| EC                      | -0.74 | 0.38  | -0.10 | 0.35  | 0.22  | 0.85  | -0.47 | 0.13  | -0.05 | 0.14  |
| temp                    | 0.91  | -0.14 | 0.18  | 0.23  | -0.15 | 0.93  | 0.25  | 0.12  | -0.03 | -0.07 |
| DO                      | -0.93 | 0.14  | -0.10 | -0.17 | 0.07  | -0.90 | -0.28 | -0.23 | 0.09  | -0.14 |
| DOC                     | -0.47 | 0.08  | 0.78  | -0.25 | 0.16  | 0.37  | -0.52 | -0.43 | -0.26 | -0.53 |
| NO <sub>3</sub>         | -0.53 | 0.10  | -0.69 | -0.34 | -0.29 | -0.46 | -0.17 | 0.37  | 0.66  | -0.25 |
| PO <sub>4</sub>         | 0.74  | 0.34  | 0.08  | 0.07  | -0.47 | 0.58  | 0.47  | -0.13 | 0.55  | 0.03  |
| HCO <sub>3</sub>        | -0.48 | 0.79  | 0.06  | 0.03  | -0.30 | 0.61  | -0.08 | 0.64  | -0.27 | 0.03  |
| Cl                      | 0.62  | 0.65  | -0.20 | -0.24 | 0.28  | 0.65  | -0.62 | -0.08 | 0.26  | 0.25  |
| Na                      | 0.66  | 0.60  | -0.13 | -0.17 | 0.38  | 0.78  | -0.43 | -0.26 | 0.28  | -0.06 |
| K                       | 0.77  | 0.45  | 0.11  | -0.20 | -0.06 | 0.97  | -0.01 | 0.06  | 0.03  | -0.10 |
| Ca                      | -0.32 | 0.68  | 0.03  | 0.57  | -0.01 | -0.40 | -0.44 | 0.64  | 0.02  | -0.24 |
| Mg                      | -0.51 | 0.33  | 0.43  | -0.32 | -0.23 | -0.60 | -0.63 | -0.06 | -0.01 | 0.43  |

**Table S10.** WQI values and water quality assessment [27] for individual months and measurement points in 2018 and 2019.

| Date      | Site |     |     |     |     |     |     |     |     |     |     |     |     |     |     |     |     |
|-----------|------|-----|-----|-----|-----|-----|-----|-----|-----|-----|-----|-----|-----|-----|-----|-----|-----|
|           | 1    | 2   | 3   | 4   | 5   | 6   | 7   | 8   | 9   | 10  | 11  | 12  | 13  | 14  | 15  | 16  | 17  |
| XI.2017   | 53   | 82  | 85  | 177 | 112 | 125 | 148 | 150 | 154 | 125 | 131 | 162 | 121 |     |     |     |     |
| XII.2017  | 17   | 46  | 56  | 143 | 93  | 151 | 266 | 262 | 208 | 140 | 110 | 133 | 110 |     |     |     |     |
| I.2018    | 55   | 92  | 114 | 132 | 119 | 286 | 258 | 125 | 136 | 116 | 108 | 141 | 109 |     |     |     |     |
| II.2018   | 34   | 70  | 84  | 157 | 97  | 150 | 117 | 124 | 130 | 124 | 128 | 105 | 111 |     |     |     |     |
| III.2018  | 55   | 80  | 52  | 150 | 82  | 210 | 130 | 99  | 90  | 98  | 120 | 137 | 168 |     |     |     |     |
| IV.2018   | 37   | 103 | 73  | 299 | 242 | 291 | 264 | 242 | 225 | 181 | 78  | 170 | 121 |     |     |     |     |
| V.2018    | 63   | 148 | 18  | 296 | 136 | 408 | 286 | 256 | 194 | 159 | 166 | 99  | 131 |     |     |     |     |
| VI.2018   | 83   | 173 | 227 | 305 | 215 | 315 | 223 | 223 | 322 | 228 | 182 | 151 | 137 |     |     |     |     |
| VII.2018  | 101  | 121 | 230 | 188 | 129 | 168 | 169 | 171 | 143 | 308 | 328 | 205 | 215 |     |     |     |     |
| VIII.2018 | 130  | 176 | 237 | 234 | 178 | 277 | 286 | 277 | 258 | 224 | 219 | 145 | 182 |     |     |     |     |
| IX.2018   | 300  | 100 | 162 | 159 | 153 | 342 | 361 | 287 | 236 | 217 | 246 | 404 | 265 |     |     |     |     |
| X.2018    | 31   | 65  | 74  | 161 | 138 | 318 | 248 | 201 | 201 | 166 | 161 | 159 |     |     |     |     |     |
|           |      |     |     |     |     |     |     |     |     |     |     |     |     |     |     |     |     |
| XI.2018   | 79   | 192 | 112 | 163 | 163 | 327 | 318 | 288 | 249 | 180 | 234 | 308 | 233 | 140 | 144 | 151 | 137 |
| XII.2018  | 57   | 81  | 77  | 143 | 94  | 377 | 135 | 124 | 135 | 144 | 130 | 174 | 164 | 183 | 128 | 158 | 203 |
| I.2019    | 64   | 22  | 87  | 132 | 88  | 356 | 253 | 225 | 150 | 134 | 99  | 92  | 80  | 122 | 117 | 81  | 115 |
| II.2019   | 72   | 88  | 78  | 179 | 140 | 112 | 141 | 140 | 155 | 155 | 163 | 157 | 146 | 73  | 60  | 63  | 55  |
| III.2019  | 2    | 17  | 22  | 121 | 74  | 75  | 101 | 86  | 74  | 74  | 70  | 70  | 27  | 49  | 38  | 28  | 35  |
| IV.2019   | 22   | 124 | 43  | 192 | 116 | 384 | 257 | 297 | 211 | 191 | 171 | 104 | 86  | 61  | 66  | 61  | 57  |
| V.2019    | 46   | 113 | 129 | 243 | 154 | 195 | 244 | 224 | 215 | 228 | 190 | 146 | 218 | 106 | 95  | 95  | 119 |
| VI.2019   | 51   | 108 | 152 | 335 | 225 | 301 | 197 | 189 | 187 | 167 | 134 | 124 | 159 | 136 | 115 | 111 | 118 |
| VII.2019  | 54   | 103 | 139 | 295 | 241 | 408 | 263 | 242 | 225 | 221 | 214 | 242 | 164 | 69  | 52  | 43  | 47  |
| VIII.2019 | 145  | 196 | 298 | 338 | 286 | 329 | 356 | 310 | 206 | 201 | 199 | 180 | 174 | 141 | 135 | 125 | 93  |
| IX.2019   | 62   | 107 | 147 | 233 | 152 | 273 | 187 | 185 | 161 | 190 | 156 | 137 | 144 | 79  | 77  | 67  | 78  |
| X.2019    | 74   | 125 | 143 | 253 | 209 | 220 | 181 | 135 | 185 | 181 | 155 | 146 | 154 | 81  | 101 | 80  | 60  |

excellent;
  good;
  poor;
  very poor;
  unsuitable
